1 **The opportunistic pathogen *Stenotrophomonas maltophilia* utilizes a type IV secretion system**  
2 **for interbacterial killing**

3

4 **Short title: *Stenotrophomonas* uses a T4SS for interbacterial competition**

5

6 Ethel Bayer-Santos<sup>1,2¶</sup>, William Cenens<sup>1¶</sup>, Bruno Yasui Matsuyama<sup>1</sup>, Giancarlo Di Sessa<sup>1</sup>, Izabel  
7 Del Valle Mininel<sup>1</sup>, Chuck Shaker Farah<sup>1,\*</sup>.

8 <sup>1</sup> Departamento de Bioquímica, Instituto de Química, Universidade de São Paulo, Brazil.

9 <sup>2</sup> Departamento de Microbiologia, Instituto de Ciências Biomédicas, Universidade de São Paulo,  
10 Brazil.

11 ¶These authors contributed equally to this work.

12 \*Corresponding author:

13 Chuck Shaker Farah (chsfarah@iq.usp.br)

14

15

16 **Keywords:** *Stenotrophomonas maltophilia*, type IV secretion system, antibacterial effectors,  
17 bacterial competition, bacterial killing.

18

19           **Abstract**

20           Bacterial type IV secretion systems (T4SS) are a highly diversified but evolutionarily  
21 related family of macromolecule transporters that can secrete proteins and DNA into the  
22 extracellular medium or into target cells. They have been long known to play a fundamental role  
23 in bacterial conjugation and virulence of several species. It was recently shown that a subtype of  
24 T4SS harboured by the plant pathogenic bacterium *Xanthomonas citri* transfers toxins into other  
25 bacteria cells resulting in cell death. In this study, we show that a similar T4SS from the multi-  
26 drug-resistant global opportunistic pathogen *Stenotrophomonas maltophilia* is proficient in killing  
27 competitor bacterial species. T4SS-dependent duelling between *S. maltophilia* and *X. citri* was  
28 observed by time-lapse fluorescence microscopy. A bioinformatic search of the *S. maltophilia*  
29 K279a genome for proteins containing a C-terminal domain (XVIPCD) conserved in *X. citri* T4SS  
30 effectors identified eleven putative effectors secreted by the *S. maltophilia* T4SS. Six of these  
31 effectors have no recognizable domain except for the XVIPCD. We selected one of these new  
32 effectors (Smlt3024) and its cognate inhibitor (Smlt3025) for further characterization and  
33 confirmed that Smlt3024 is indeed secreted in a T4SS-dependent manner by *S. maltophilia* when  
34 in contact with a target bacterial species. Expression of Smlt3024 in the periplasm of *E. coli*  
35 resulted in greatly reduced growth rate and cell size, which could be counteracted by co-expression  
36 with its cognate periplasmic inhibitor, Smlt3025. This work expands our current knowledge about  
37 the diverse function of T4SSs subtypes and increases the panel of effectors known to be involved  
38 in T4SS-mediated interbacterial competition. Further elucidation of the mechanism of these  
39 antibacterial proteins could lead to the discovery of new antibacterial targets. The study also adds  
40 information about the molecular mechanisms possibly contributing to the establishment of *S.*  
41 *maltophilia* in different biotic and abiotic surfaces in both clinical and environmental settings.

43           **Author Summary**

44           Competition between microorganisms for nutrients and space determines which species  
45 will emerge and dominate or be eradicated from a specific habitat. Bacteria use a series of  
46 mechanisms to kill or prevent multiplication of competitor species. Recently, it was reported that  
47 a subtype of type IV secretion system (T4SS) works as a weapon to kill competitor bacterial  
48 species. In this study, we show that an important human opportunistic pathogen,  
49 *Stenotrophomonas maltophilia*, harbours a T4SS that promotes killing of competitor species. We  
50 also identified a series of new toxic proteins secreted by *S. maltophilia* via its T4SS to poison  
51 competitor species. We showed that two different bacterial species that harbour a bacteria-killing  
52 T4SS can kill each other; most likely due to differences in effector-immunity protein pairs. This  
53 work expands our current knowledge about the bacterial arsenal used in competitions with other  
54 species and expands the repertoire of antibacterial ammunition fired by T4SSs. In addition, the  
55 work contributes with knowledge on the possible mechanisms used by *S. maltophilia* to establish  
56 communities in different biotic and abiotic surfaces in both clinical and environmental settings.

## 58            **Introduction**

59            The ecological interactions between bacterial species range from cooperative to  
60 competitive and can be mediated by diffusible soluble factors secreted into the extracellular  
61 medium or by factors transferred directly into target cells in a contact-dependent manner [1].  
62 Several types of contact-dependent antagonistic interactions between bacteria have been described.  
63 Contact-dependent growth inhibition (CDI) is mediated by the CdiA/CdiB family of two-partner  
64 secretion proteins composed of the CdiB outer membrane protein that is required for secretion of  
65 CdiA, which contains a C-terminal toxin domain [2, 3]. The type VI secretion system (T6SS) is a  
66 dynamic contractile organelle evolutionarily related to bacteriophage tails that is attached to the  
67 cell envelope, enabling the injection of proteinaceous effectors into target prokaryotic or  
68 eukaryotic cells [4, 5]. More recently, contact-dependent antagonism was reported to be mediated  
69 via a specialized type IV secretion system (T4SS) that transports toxic effectors into target  
70 prokaryotic cell [6].

71            T4SSs are a highly diverse superfamily of secretion systems found in many species of  
72 Gram-negative and Gram-positive bacteria. These systems mediate a wide range of events from  
73 transfer of DNA during bacterial conjugation to transfer of effector proteins into infected  
74 eukaryotic host cells [7] and into competitor bacteria [6]. T4SSs have been classified based on  
75 their physiological functions as (i) conjugation systems, (ii) effector translocators, or (iii) contact-  
76 independent DNA/protein exchange systems [8]. Another common classification scheme divides  
77 T4SSs into two phylogenetic families called types A and B [9, 10]; while more finely  
78 discriminating phylogenetic analyses based on two highly conserved T4SS ATPases (VirB4 and  
79 VirD4) identified eight distinct clades [11, 12].

80           The model type A VirB/D4 T4SS from *Agrobacterium tumefaciens*, which is used to  
81 transfer tumour-inducing effectors into some plants species [13], is composed of a core set of 12  
82 proteins designated VirB1-VirB11 and VirD4. Electron microscopy studies on homologous  
83 systems from the conjugative plasmids R388 and pKM101 have revealed an architecture that can  
84 be divided into two large subcomplexes: i) a periplasmatic core complex made up of 14 repeats of  
85 VirB7, VirB9 and VirB10 subunits that forms a pore in the outer membrane and which is also  
86 linked, via VirB10, to the inner membrane and ii) an inner membrane complex composed of VirB3,  
87 VirB6 and VirB8 and three ATPases (VirB4, VirB11 and VirD4) that energize the system during  
88 pilus formation and substrate transfer. Finally, VirB2 and VirB5 form the extracellular pilus and  
89 VirB1 is a periplasmic transglycosidase [14-16]. The *X. citri* T4SS involved in bacterial killing  
90 shares many features with the type A T4SSs from *A. tumefaciens* and the conjugative T4SSs  
91 pKM101 and R388, with one distinctive feature being an uncharacteristically large VirB7  
92 lipoprotein subunit [17] whose C-terminal N0 domain decorates the periphery of the outer  
93 membrane layer of the core complex [18].

94           VirD4 and its orthologs play a key role by recognizing substrates on the cytoplasmic face  
95 of the inner membrane and directing them for secretion through the T4SS channel [9, 19-21]. A  
96 yeast two-hybrid screen using *X. citri* VirD4 as bait identified several prey proteins (initially  
97 termed XVIPs for *Xanthomonas* VirD4 interacting proteins) containing a conserved C-terminal  
98 domain named XVIPCD (XVIP conserved domain) [22]. These proteins were later shown to be  
99 toxic antibacterial effectors secreted via the *X. citri* T4SS into target cells, often carrying N-  
100 terminal domains with enzymatic activities predicted to target structures in the cell envelope,  
101 including peptidoglycan-targeting glycohydrolases and proteases, phospholipases, as well as  
102 nucleases [6]. Furthermore, each T4SS effector is co-expressed with a cognate immunity protein,

103 which functions to prevent self-intoxication [6], a feature also observed for toxin-antitoxin pairs  
104 associated with T6SSs [23]. Bioinformatic analysis identified potential XVIPCD-containing  
105 proteins in many other bacterial species of the Xanthomonadaceae family, including  
106 *Stenotrophomonas* spp., *Lysobacter* spp., *Luteimonas* spp., and species of the closely related  
107 Rodanobacteraceae family, including *Luteibacter* spp. and *Dyella* spp. Therefore, these effectors  
108 and their cognate immunity proteins were generally designated X-Tfes and X-Tfis  
109 (Xanthomonadaceae T4SS effectors and immunity proteins, respectively) [6].

110 *Stenotrophomonas maltophilia* is an emerging multi-drug-resistant global opportunistic  
111 pathogen. *S. maltophilia* strains are frequently isolated from water, soil and in association with  
112 plants [24], but in the last decades an increased number of hospital-acquired infections, particularly  
113 of immunocompromised patients, has called attention to this opportunistic pathogen [25, 26].  
114 Infections associated with virulent strains of *S. maltophilia* are very diverse, ranging from  
115 respiratory and urinary tract infections to bacteremia and infections associated with intravenous  
116 cannulas and prosthetic devices [25]. The ability of *Stenotrophomonas* spp. to form biofilms on  
117 different biotic and abiotic surfaces [27, 28] and its capacity to secrete several hydrolytic enzymes  
118 (proteases, lipases, esterases) that promote cytotoxicity contribute to pathogenesis [29, 30]. In  
119 addition, *S. maltophilia* is naturally competent to acquire foreign DNA, which probably contributes  
120 to the multi-drug-resistant phenotype of several strains [24, 31].

121 *S. maltophilia* strain K279a contains a cluster of genes on its chromosome encoding for a  
122 T4SS homologous to the T4SS of the plant pathogen *Xanthomonas citri* involved in interbacterial  
123 antagonism [6], and their cytoplasmic ATPases VirD4 share 79% amino acid identity (Figure 1A).  
124 In this study, we show that *S. maltophilia* K279a is proficient in inducing *Escherichia coli* death  
125 in a T4SS-dependent manner. Interestingly, *S. maltophilia* and *X. citri* can duel using their T4SSs

126 and kill each other. We identified eleven putative new effectors (X-Tfes) encoded by the *S.*  
127 *maltophilia* T4SS genome. Further characterization of one of the effectors (Smlt3024)  
128 demonstrated that it is secreted by *Stenotrophomonas* K279a in a T4SS-dependent manner upon  
129 contact with *E. coli*. Additionally, the heterologous expression of Smlt3024 in the periplasm of *E.*  
130 *coli* had a deleterious effect on its growth and altered cell size, which could be neutralized by co-  
131 expression of the respective cognate immunity protein, Smlt3025. This work expands our current  
132 knowledge about the subtypes of T4SSs that are involved in interbacterial competition and about  
133 the molecular mechanisms contributing to *S. maltophilia* establishment in hospital and  
134 environmental settings that may contribute to its behavior as an opportunistic pathogen.

135

## 136 **Results**

### 137 ***Stenotrophomonas maltophilia* VirB/T4SS induces target bacteria cell death**

138 The genome of *S. maltophilia* K279a [32] harbours two clusters of genes encoding distinct  
139 T4SSs: *smlt1283-smlt1293* (annotated as *trb*) and *smlt2997-smlt3008* (annotated as *virB*) [33].  
140 Comparative sequence analysis showed that the *S. maltophilia virB1-11* and *virD4* genes are most  
141 closely related with their counterparts in *X. citri* involved in bacterial killing (37% - 82% identity  
142 at the amino acid level), with the three ATPases that energize the system presenting the greatest  
143 levels of identity: VirB4 (81%), VirB11 (82%) and VirD4 (79%) (Fig. 1A). Phylogenetic analysis  
144 based on the amino acid sequences of *S. maltophilia* VirD4/Smlt3008 grouped the *S. maltophilia*  
145 VirB/T4SS together with the *X. citri* VirB/T4SS involved in bacterial killing, while  
146 *Stenotrophomonas* Trb/T4SS belongs to another group of T4SSs (S1 Fig). The second T4SS from  
147 *X. citri* (encoded by plasmid pXAC64), which was proposed to be involved in conjugation due to

148 neighbouring relaxosome genes and *oriT* site, is located in another branch in the phylogenetic tree,  
149 distinctly from the above two systems (S1 Fig) [22].

150 To investigate the involvement of the *S. maltophilia* VirB/T4SS in bacterial antagonism,  
151 we created a mutant strain lacking the ATPase coupling protein VirD4 ( $\Delta virD4$ ) and analysed its  
152 ability to restrict growth of other species such as *E. coli*. Different dilutions of an *E. coli* culture  
153 were mixed with a fixed number of *S. maltophilia* cells and the co-cultures were spotted onto LB-  
154 agar plates containing the chromogenic substrate X-gal and incubated for 24 h at 30°C (Fig 1B).  
155 As only *E. coli* cells naturally express  $\beta$ -galactosidase, they turn blue while *S. maltophilia* cells are  
156 yellow. Growth of *E. coli* was inhibited by *S. maltophilia* wild-type, but not by the  $\Delta virD4$  strain  
157 (Fig 1B). The phenotype of *S. maltophilia*  $\Delta virD4$  could be restored by complementing the strain  
158 with a plasmid encoding VirD4 (*smlt3008*) under the control of the P<sub>BAD</sub> promoter ( $\Delta virD4$   
159 *virD4<sup>C</sup><sub>smlt</sub>*) (Fig 1B). This plasmid promotes low expression levels under non-inducing conditions  
160 (no L-arabinose) in *Stenotrophomonas* and is usually sufficient for complementation.  
161 Interestingly, transformation of *S. maltophilia*  $\Delta virD4$  strain with a plasmid encoding VirD4 from  
162 *X. citri* (*xac2623*) ( $\Delta virD4$  *virD4<sup>C</sup><sub>xac</sub>*) also restored the phenotype, indicating that these proteins  
163 are functionally redundant (Fig 1B).

164 To analyse bacterial antagonism at shorter time-points, we measured *E. coli* cell lysis after  
165 mixing with different *S. maltophilia* strains (wild-type,  $\Delta virD4$ ,  $\Delta virD4$  *virD4<sup>C</sup><sub>smlt</sub>* and  $\Delta virD4$   
166 *virD4<sup>C</sup><sub>xac</sub>*). The cultures were mixed and immediately spotted onto 96 well plates containing LB-  
167 agar with CPRG, which is a cell-impermeable chromogenic substrate hydrolysed by  $\beta$ -  
168 galactosidase released from lysed *E. coli*, thus producing chlorophenol red with an absorbance  
169 maximum at 572 nm. Fig 1C shows that *S. maltophilia* wild-type and complemented strains  
170 ( $\Delta virD4$  *virD4<sup>C</sup><sub>smlt</sub>* and  $\Delta virD4$  *virD4<sup>C</sup><sub>xac</sub>*) induce lysis of *E. coli* shortly after co-incubation



171 (around 10 min). Based on the slope of the curves, the data suggests that all three *S. maltophilia*  
172 strains induce *E. coli* cell lysis with very similar efficiencies (Fig 1C).

173 Live-cell imaging of *S. maltophilia* wild-type co-incubated with *E. coli-RFP* expressing  
174 red fluorescent protein (RFP) shows that *Stenotrophomonas* induces *E. coli* cell lysis in a contact-  
175 dependent manner (Fig 1D and Movie S1). No cell lysis was detected when *E. coli* was co-  
176 incubated with *S. maltophilia*  $\Delta virD4$  (Fig 1D and Movie S2). Quantification of *E. coli* cell lysis  
177 over a time-frame of 100 min shows that around 50% of *E. coli* cells in contact with  
178 *Stenotrophomonas* wild-type were observed to lyse during this period, while no cell lysis was  
179 detected when *E. coli* was mixed with *S. maltophilia*  $\Delta virD4$  (Fig 1E). It is important to note that  
180 this quantification does not measure (most likely sub-estimates) the efficiency of killing as some  
181 *E. coli* cells may be intoxicated without cellular lysis and the time of target-cell lysis may vary  
182 after the initial physical contact.

183 As *X. citri* is the only other bacterial species described to date experimentally shown to use  
184 a T4SS for interbacterial killing, we decided to analyse whether *S. maltophilia* and *X. citri* could  
185 use their T4SS to compete with and kill each other. First, we co-incubated *S. maltophilia* (either  
186 wild-type or  $\Delta virD4$ ) with a *X. citri* T4SS mutant strain lacking all the chromosomal *virB* genes  
187 and expressing green fluorescent protein (GFP) under the control of *virB7* endogenous promoter  
188 ( $\Delta virB-GFP$ ) (Cenens et al., manuscript in preparation) and confirmed that *S. maltophilia* can  
189 induce lysis of *X. citri*  $\Delta virB-GFP$  in a T4SS-dependent manner (Figs 2A and 2C; Movie S3 and  
190 S4). Next, we co-incubated *X. citri-GFP* (functional T4SS) with *S. maltophilia* wild-type or  
191  $\Delta virD4$  strains. Besides showing that *X. citri* can induce lysis of *S. maltophilia*  $\Delta virD4$  (Movie  
192 S5), we observed that when both wild-type species are mixed, they duel and kill each other in a  
193 T4SS-dependent manner (Figs 2B and 2D; Movie S6). *S. maltophilia* seems to be slightly more

194 effective in killing *X. citri* via its T4SS, which could be due to the efficiency of the T4SS and/or  
195 the shorter doubling-time of *S. maltophilia* compared to *X. citri*.

196

### 197 **Identification of eleven putative effectors secreted via the *S. maltophilia* VirB/T4SS**

198 After confirming that the *S. maltophilia* VirB/T4SS is functional and induces target cell  
199 death, we decided to search for effector proteins translocated by this system. As the VirD4  
200 coupling protein of *X. citri* complements the  $\Delta virD4$  strain of *S. maltophilia* (Figs 1B and 1C), we  
201 hypothesized that potential substrates secreted via the T4SS of *S. maltophilia* could be identified  
202 by applying a bioinformatic approach using the C-terminal domains of *X. citri* X-Tfes (XVIPCDs)  
203 to search the genome of *S. maltophilia* K279a. Using this approach, we identified eleven *S.*  
204 *maltophilia* proteins as potential T4SS substrates (Fig 3A, S1 Table). All these putative X-Tfes  
205 were identified using searches with the XVIPCDs from at least seven different *X. citri* X-Tfes (S1  
206 Table). Amino acid sequence alignment of C-terminal XVIPCDs from *Stenotrophomonas* X-Tfes  
207 revealed a series of conserved amino acid motifs that are also present in *X. citri* X-Tfes [22] (Fig  
208 3B).

209 All identified *S. maltophilia* effectors are organized in small operons together with an  
210 upstream gene encoding a conserved hypothetical protein, reminiscent of the organization of  
211 effectors with their immunity proteins [6, 34]. Five of the identified *S. maltophilia* T4SS substrates  
212 harbour domains already described in other bacterial toxins such as lipases, nucleases, lysozyme-  
213 like hydrolases and proteins with peptidoglycan binding domains (Fig 3A). Three of these effectors  
214 (*smlt2990*, *smlt2992* and *smlt3024*) are encoded by genes very close to the *S. maltophilia* *virB*  
215 locus (genes *smlt2997* to *smlt3008*), further illustrating the link of these effectors with the T4SS.  
216 It is interesting to note that six of the identified putative *Stenotrophomonas* T4SS effectors do not

217 display any known protein domain that could indicate the mechanism mediating the antibacterial  
218 toxicity (*smlt0113*, *smlt0332*, *smlt0500*, *smlt0502*, *smlt0505*, *smlt3024*) (Fig 3). To validate our  
219 findings and obtain further insight regarding the function of the effectors with domains of unknown  
220 function, we selected the products of the *smlt3024* gene and its upstream, putatively co-transcribed,  
221 partner (*smlt3025*) for further characterization.

222

223 **Smlt3024 is a periplasmic-acting toxin that impairs cell growth and is inhibited by**  
224 **periplasmic Smlt3025**

225 BLASTp searches for Smlt3024 homologues (excluding the C-terminal XVIPCD)  
226 retrieved sequences from *Stenotrophomonas* spp., *Xanthomonas* spp., and *Lysobacter* spp.  
227 annotated either as hemolysin/hemolysin-related or as hypothetical proteins (S1B Table).  
228 However, none of these proteins contain a domain similar to any annotated domain in the Pfam  
229 database [35]. In its genomic context, *smlt3024* seems to be organized in an operon downstream  
230 to two genes encoding for its putative cognate immunity protein (*smlt3025*) and another small  
231 protein containing a helix-turn-helix (HTH) domain annotated as a putative transcriptional  
232 regulator (*smlt3026*) (Fig 4A).

233 To determine whether Smlt3024 is indeed an effector secreted via the *S. maltophilia* T4SS,  
234 we cloned an N-terminal FLAG-tagged version of *smlt3024* (FLAG-Smlt3024) into the pBRA  
235 plasmid under the control of the P<sub>BAD</sub> promoter and used it to transform both *S. maltophilia* wild-  
236 type and  $\Delta virD4$  strains. These strains were co-incubated with *E. coli* and spotted onto  
237 nitrocellulose membranes placed over LB-agar plates containing 0.1% L-arabinose and incubated  
238 for 6 h at 30°C. The membranes were later processed for immunodetection with an anti-FLAG  
239 antibody. Results show an increase in signal intensity for FLAG-Smlt3024 when *S. maltophilia*

240 was co-incubated with *E. coli* (Figs 4B and 4C), while no increase was detected when *S.*  
241 *maltophilia*  $\Delta virD4$  was co-incubated with *E. coli* (Figs 4B and 4C). In addition, no increase in  
242 signal intensity could be detected when *S. maltophilia* FLAG-Smlt3024 was incubated without  
243 target *E. coli* cells (Fig 4B). SDS-PAGE of total protein extracts followed by western blot with  
244 anti-FLAG antibody showed that both *S. maltophilia* wild-type and  $\Delta virD4$  strains were expressing  
245 similar levels of FLAG-Smlt3024 (S2 Fig). These results show that secretion of Smlt3024 is  
246 dependent on contact with a target cell and on a functional T4SS.

247 To assess whether Smlt3025 is the cognate immunity protein of Smlt3024, we analysed  
248 whether these proteins could interact by expressing and purifying full-length Smlt3024 and a  
249 soluble version of Smlt3025 (amino acid residues 86-333), lacking its N-terminal signal peptide.  
250 Complex formation was analysed using size exclusion chromatography coupled to multiple-angle  
251 light scattering (SEC-MALS) (Fig 4E). The MALS analysis calculated average masses for  
252 Smlt3024 and Smlt3025<sub>86-333</sub> of 52.3 kDa and 27.5 kDa, respectively, which are very close to the  
253 theoretical values of their monomer molecular masses of 49 kDa and 28 kDa, respectively (Fig.  
254 4E). When a mixture of these proteins was analysed by SEC-MALS followed by SDS-PAGE, a  
255 new peak appeared containing both Smlt3024 and Smlt3025<sub>86-333</sub> with an average molecular mass  
256 calculated by MALS of 74.2 kDa, suggesting that a stable 1:1 complex (theoretical mass of 77  
257 kDa) was formed between Smlt3024 and Smlt3025<sub>86-333</sub> (Fig 4E).

258 If Smlt3024 is indeed a toxic effector secreted by the *S. maltophilia* T4SS, then we would  
259 expect that its expression in the appropriate compartment within *E. coli* would create an  
260 impairment of bacterial growth. To evaluate the toxicity of Smlt3024 upon expression in *E. coli*  
261 and to establish in which cellular compartment Smlt3024 exerts its effect, we cloned the full-length  
262 protein into pBRA placing it under control of the P<sub>BAD</sub> promoter (inducible by L-arabinose and

263 repressed by D-glucose) both with and without an N-terminal *pelB* periplasmic localization signal  
264 sequence. We also cloned the sequence of the Smlt3025 immunity protein into the pEXT22 vector  
265 placing it under the control of P<sub>TAC</sub> promoter, which can be induced by IPTG. We noted that the  
266 annotated sequence for Smlt3025 has a non-canonical GTG start codon with 4 possible in frame  
267 ATG start codons at positions 13, 45, 47 and 50 and that initiation at positions 45, 47 or 50 would  
268 produce proteins with an N-terminal signal sequence for periplasmic localization (Fig. 4D) [36].  
269 Therefore, three versions of Smlt3025, beginning at positions 1, 13 and 45 were cloned into  
270 pEXT22, leading to the production of Smlt3025<sub>1-333</sub>, Smlt3025<sub>13-333</sub> and Smlt3025<sub>45-333</sub>. *E. coli*  
271 strains carrying the different combinations of pBRA-Smlt3024 and each one of the pEXT22-  
272 Smlt3025 plasmids were serially diluted and incubated on LB-agar plates containing either D-  
273 glucose, L-arabinose or L-arabinose plus IPTG (D-glucose inhibits and L-arabinose induces  
274 expression of Smlt3024; IPTG induces expression of Smlt3025). Results showed that Smlt3024 is  
275 toxic only when directed to the periplasm of *E. coli* cells (pBRA-*pelB-smlt3024*) but not in the  
276 cytoplasm (pBRA-*smlt3024*), and that only Smlt3025<sub>45-333</sub> which is directed to the periplasm,  
277 could neutralize Smlt3024 toxicity (Fig. 4F).

278 To gather further insight on the mechanism by which Smlt3024 could induce toxicity, we  
279 decided to perform time-lapse microscopy to evaluate growth and morphology of individual *E.*  
280 *coli* cells carrying the empty pBRA or pBRA-*pelB-smlt3024* plasmids. *E. coli* carrying the empty  
281 plasmid incubated on LB-agar with 0.2% L-arabinose (Fig 4G and Movie S7) as well as the  
282 repressed pBRA-*pelB-smlt3024* (0.2% D-glucose) grew normally (Fig 4G and Movie S8). Upon  
283 induction with L-arabinose, cells carrying pBRA-*pelB-smlt3024* quickly experienced a strong  
284 reduction in growth rate and single cells were smaller (average length of  $2.1 \pm 0.7 \mu\text{m}$  after 300  
285 min) compared to the controls incubated in glucose (average length of  $3.6 \pm 1.2 \mu\text{m}$  after 300 min)

286 (Fig 4G and Movie S9). Despite the severe delay in doubling time, *E. coli* cells expressing PelB-  
287 Smlt3024 seem to remain viable and continue growing and dividing for up to 8 h (Movie S9).

288

## 289 **Discussion**

290 Competition between microorganisms for nutrients and space often determines which  
291 species will thrive and dominate or be eradicated from a specific habitat. The recently identified  
292 T4SS involved in bacterial killing has revealed another weapon in the bacterial warfare arsenal  
293 [6]. In this manuscript, we show that the T4SS of *S. maltophilia* is involved in interbacterial  
294 competition, allowing it to induce lysis of *E. coli* and *X. citri* and possibly many other Gram-  
295 negative species. The *S. maltophilia* VirB/T4SS is the second example described to date of a T4SS  
296 subtype involved in bacterial killing and it is the first example of a human opportunistic pathogen  
297 shown to mediate bacterial killing via a T4SS.

298 *S. maltophilia* is often found as a member of microbial communities in water, soil and in  
299 association with plants. Some *Stenotrophomonas* species like *S. maltophilia* and *S. rhizophila* can  
300 participate in beneficial interactions with plants, but no species were reported to be  
301 phytopathogenic, which distinguishes *Stenotrophomonas* from the phylogenetically related genera  
302 *Xanthomonas* and *Xylella* [24]. More importantly, an increasing number of hospital-acquired *S.*  
303 *maltophilia* infections over the last decades has led to the classification of this bacterium as an  
304 emerging opportunistic pathogen [25, 26]. Key to the opportunistic behaviour of *S. maltophilia*  
305 strains are their ability to form biofilms and their resistance to multiple antibiotics. In this context,  
306 the antibacterial property of its T4SS probably provides a competitive advantage to *S. maltophilia*  
307 in polymicrobial communities, contributing to increased fitness.

308           The most worrying aspect of pathogenic *S. maltophilia* strains is their multi-drug resistance  
309 phenotype [37]. As *S. maltophilia* is naturally competent to acquire foreign DNA (Berg et al.,  
310 1999, Ryan et al., 2009), it would be interesting to analyse the contribution of the T4SS described  
311 here in promoting *Stenotrophomonas* transformation and the acquisition of antibiotic resistance  
312 genes. Such a mechanism has already been reported in *Vibrio cholerae*, which uses a T6SS as a  
313 predatory killing device to induce target cell lysis concomitantly with target-cell DNA uptake to  
314 promote bacterial transformation [38].

315           The T6SS has been shown to play important roles during colonization and infection by  
316 enteric pathogenic bacteria such as *Salmonella* and *Shigella* [39, 40]. The contribution of *S.*  
317 *maltophilia* T4SS to colonization and maintenance within mammalian hosts is still unknown. As  
318 *S. maltophilia* is frequently associated with cystic fibrosis patients [41, 42], it would be interesting  
319 to analyse the ability of mutant strains lacking a functional T4SS to compete with oral and nasal  
320 microbiota during infection of susceptible model organisms [43, 44].

321           The new effector/immunity protein (X-Tfe/X-Tfi) pairs identified in this study expand our  
322 knowledge on the different effector proteins promoting target-cell toxicity mediated by T4SSs.  
323 Most of the characterized T4SS and T6SS antibacterial toxins are enzymes that degrade structural  
324 cellular components such as peptidoglycan and phospholipids, thus promoting target cell lysis  
325 [45]. Recent studies have identified effectors that change cell metabolism promoting altered cell  
326 growth rather than lysis [46, 47]. Promoting target cell stasis is in most cases sufficient to provide  
327 the attacker with a competitive advantage, allowing it to outnumber the target species and establish  
328 itself in the environment. In natural settings, many species are likely to have acquired resistance  
329 mechanisms by means of immunity proteins against specific secreted effectors and may be  
330 sensitive to only one or a few effectors within the secreted cocktail. Additionally, bacterial



331 effectors work synergistically and display conditional efficiency depending on the environment  
332 [48]. An example of the diversity of effector-immunity pairs carried by different organisms is  
333 clearly illustrated here by the duelling observed between *S. maltophilia* and *X. citri*, which can kill  
334 one another in a T4SS-dependent manner, indicating that each species lacks at least one immunity  
335 protein against the rival's set of T4SS effectors.

336         Among the eleven new *S. maltophilia* T4SS effectors identified by bioinformatic searches,  
337 six of them have N-terminal domains that are not significantly similar in sequence to any other  
338 annotated protein domain family. These X-Tfes are particularly interesting since they could  
339 possibly promote toxic effects by different mechanisms from those described for the majority of  
340 antibacterial type 6- and type 4 effectors that target the cell wall, membranes or nucleic acids [6,  
341 46, 49-51]. Smlt3024 induced a severe reduction in growth speed and a decrease in cell size in rich  
342 media. However, despite the delay, cells continue to grow for over 8 h (Movie S9), indicating that  
343 Smlt3024 expression does not lead to cell death in laboratory conditions. As slower growth speed  
344 and decreased cell-sizes are reminiscent of cells growing in nutrient deprived media [52], we  
345 speculate that Smlt3024 could somehow induce a starvation response either by mimicking a  
346 systemic response, blocking an important metabolic pathway or blocking a key nutrient importer.

347         This work contributes with knowledge on the virulence mechanisms used by *S. maltophilia*  
348 allowing it to survive in polymicrobial communities and maintain environmental reservoirs. The  
349 work also expands our current knowledge about the subtypes of T4SSs involved in interbacterial  
350 killing for which the diversity and mechanism of toxicity from secreted substrates, and distribution  
351 among bacterial species we are only beginning to understand.

352

## 353         **Materials and Methods**



354 **Bacterial strains and culture conditions**

355 *S. maltophilia* K279a [32] and *X. citri* pv. *citri* 306 [53] were grown in 2x YT media (16  
356 g/L tryptone, 10 g/L yeast extract, 5 g/L NaCl). *E. coli* strain K-12 subsp. MG1655 [54] was used  
357 in competition assays because of its endogenous expression of  $\beta$ -galactosidase. *E. coli* DH5 $\alpha$  and  
358 *E. coli* HST08 were used for cloning purposes and *E. coli* S17 was used for conjugation with *S.*  
359 *maltophilia*. The *X. citri* T4SS mutant strain lacks all chromosomal *virB* genes and has the *msfGFP*  
360 gene under the control of *virB7* endogenous promoter ( $\Delta$ *virB-GFP*) while the *X. citri-GFP* strain  
361 has a functional T4SS and expresses GFP as transcriptional fusion under the control of *virB7*  
362 promoter (Cenens et al., in preparation). For time-lapse imaging of *S. maltophilia* and *X. citri*  
363 strains, AB defined media was used (0.2% (NH<sub>4</sub>)<sub>2</sub>SO<sub>4</sub>, 0.6% Na<sub>2</sub>HPO<sub>4</sub>, 0.3% KH<sub>2</sub>PO<sub>4</sub>, 0.3% NaCl,  
364 0.1 mM CaCl<sub>2</sub>, 1 mM MgCl<sub>2</sub>, 3  $\mu$ M FeCl<sub>3</sub>) supplemented with 0.2% sucrose, 0.2% casamino acids,  
365 10  $\mu$ g/mL thiamine and 25  $\mu$ g/mL uracil. Cultures of *E. coli* and *S. maltophilia* were grown at  
366 37°C with agitation (200 rpm) and *X. citri* cultures were grown at 28°C with agitation (200 rpm).  
367 Antibiotics were used at the following concentrations to select *S. maltophilia* strains: tetracycline  
368 40  $\mu$ g/mL and streptomycin 150  $\mu$ g/mL. For selection of *E. coli* strains, kanamycin 50  $\mu$ g/ml and  
369 spectinomycin 100  $\mu$ g/ml were used when appropriate. For induction from P<sub>BAD</sub> promoter, 0.2%  
370 L-arabinose was added. For P<sub>TAC</sub> induction, 200  $\mu$ M IPTG was used. Expression from both  
371 promoters was repressed using 0.2% D-glucose.

372 **Cloning and mutagenesis**

373 All primers and plasmids used for cloning are listed in S2 Table. To produce in-frame  
374 deletions of *virD4* (*smlt3008*), we used a two-step integration/excision exchange process and the  
375 pEX18Tc vector [55]. Fragments of ~1000-bp homologous to the upstream and downstream  
376 regions of *smlt3008* were amplified by PCR and cloned into pEX18Tc using standard restriction

377 digestion and ligation. The pEX18Tc- $\Delta virD4$  was transformed in *E. coli* S17 donor cells by  
378 electroporation and transferred to *S. maltophilia* recipients via conjugation following the protocol  
379 described by Welker et al. [56]. Tetracycline-resistant colonies were first selected. Colonies were  
380 then grown in 2x YT without antibiotic and plated on 2x YT agar containing 10% sucrose without  
381 antibiotic. Mutant clones were confirmed by PCR. To complement the  $\Delta virD4$  strain, the gene  
382 encoding full-length *smlt3008* was PCR amplified from genomic DNA and cloned into the pBRA  
383 vector, which is a pBAD24-derived vector that promotes low constitutive expression in  
384 *Stenotrophomonas/Xanthomonas* under non-inducing conditions (M. Marroquin, unpublished).  
385 The pBRA construct encoding full-length *X. citri virD4/XAC2623* was reported previously [6].  
386 For secretion assays, the full-length sequence of *smlt3024* was cloned into pBRA vector, including  
387 a FLAG tag on its N-terminus and transformed into *S. maltophilia* wild-type and  $\Delta virD4$ . Plasmids  
388 were transformed into *S. maltophilia* by electroporation (2.5 kV, 200  $\Omega$ , 25  $\mu$ F, 0.2 cm cuvettes),  
389 followed by streptomycin selection. For cloning *smlt3024* and *smlt3025* into pSUMO – a modified  
390 version of pET28a (Novagen), adding a SUMO tag between the hexahistidine and the cloning site  
391 – we used the soluble portion of Smlt3025 (residues between 86-333) that lacks the N-terminal  
392 signal peptide and the full-length Smlt3024. To produce *smlt3024* with the *pelB* periplasmic  
393 localization sequence, PCR products were first cloned in pET22b (Novagen; containing the N-  
394 terminal *pelB* sequence) after the *pelB-smlt3024* construct was transferred to pBRA using Gibson  
395 assembly. For the immunity protein *smlt3025*, three different constructs were cloned in pEXT22  
396 [57]: one starting at the annotated start-codon and two starting at two downstream putative start-  
397 codons (positions 17 and 45). The sequences of all constructs containing effectors in pBRA and  
398 immunity proteins in pEXT22 were confirmed by DNA sequencing to assure absence of point

399 mutations in the cloned genes and upstream promoter sites using the Macrogen standard  
400 sequencing service (<https://dna.macrogen.com/>).

#### 401 **Bacterial competition assays**

402 Bacterial competition was assessed either by analysing target cell growth or target cell  
403 lysis. To analyse *E. coli* growth during co-incubation with *S. maltophilia* we used a protocol  
404 adapted from Hachani et al. [58]. Briefly, strains were subcultured 1:100 and grown to exponential  
405 phase for 2 h at 37°C (200 rpm). Cells were washed with 2x YT and the optical density measured  
406 at 600 nm (OD<sub>600nm</sub>) adjusted to 1. Serial dilutions (1:4) of *E. coli* culture was performed in 96  
407 well plates. Equal volumes of *E. coli* and *S. maltophilia* cultures at OD<sub>600nm</sub> 1.0 were mixed into  
408 each well. After mixing, 5 µl were spotted onto LB-agar plates containing 100 µM IPTG (isopropyl  
409 β-D-1-thiogalactopyranoside) and 40 µg/mL X-gal (5-bromo-4-chloro-3-indolyl-β-D-  
410 galactopyranoside) using multichannel pipettes. Plates were incubated for 24 h at 30°C. Analysis  
411 of target cell death was performed using CPRG (chlorophenol red-β-D-galactopyranoside) as  
412 described previously with minor modifications [18, 59]. Briefly, *S. maltophilia* and *E. coli*  
413 overnight cultures were subcultured 1:100 – the latter containing 200 µM IPTG – and grown at  
414 37°C (200 rpm) to reach OD<sub>600nm</sub> of approximately 1. Cells were washed with LB media, OD<sub>600nm</sub>  
415 adjusted to 1.0 for *S. maltophilia* strains and OD<sub>600nm</sub> adjusted to 8.0 for *E. coli*. The adjusted  
416 cultures were mixed 1:1 and 10 µL spotted in triplicate onto 96 well plates containing 100 µL of  
417 solid 1.5% 2x YT agar and 40 µg/mL CPRG. Plates were let dry completely, covered with adhesive  
418 seals and analysed on a SpectraMax Microplate Reader (Molecular Devices) at 572 nm every 10  
419 min for 3.5 h. *E. coli* cultures were also spotted onto the same plate as a control for spontaneous  
420 cell death. The obtained A<sub>572</sub> data was processed using RStudio ([www.rstudio.com](http://www.rstudio.com)) and plotted  
421 using the ggplot2 package [60]. Background intensities obtained from the mean A<sub>572</sub> values

422 containing only *E. coli* cells were subtracted from all data series. The initial  $A_{572}$  value at time-  
423 point 0 min was subtracted from all subsequent time-points to correct for small differences in  
424 initial measurements. Finally, the curves of *S. maltophilia*  $\Delta virD4$  and complementation strains  
425 were normalized to those obtained for the *S. maltophilia* wild-type strain.

#### 426 **Time-lapse microscopy**

427 For time-lapse imaging of bacterial killing at the single-cell level, agar slabs containing  
428 either 2x YT or supplemented AB media were created by cutting a rectangular frame out of a  
429 double-sided adhesive tape (3M™ VHB™ transparent, 24 mm wide, 1 mm thick), which was  
430 taped onto a first microscopy slide. Into the resulting tray, agar was poured and covered by a  
431 second microscopy glass slide to create a smooth surface. After solidification, the second  
432 microscopy slide was removed, exposing the agar's surface onto which 2  $\mu$ l of cell suspensions  
433 were spotted. After cell suspensions were left to dry completely, a #1.5 cover glass (Corning) was  
434 laid on top of the agar slab and closed at the sides by the second adhesive layer of the tape, leaving  
435 the cell mixtures closely and stably pressed between cover glass and the agar slab. Soon after,  
436 phase contrast images together with GFP or RFP excitation images were obtained with a Leica  
437 DMI-8+ epi-fluorescent microscope equipped with the Leica DFC365 FX camera, a HC PL APO  
438 100x/1.4 Oil ph3 objective (Leica), a GFP excitation-emission band-pass filter cube (Ex: 470/40,  
439 DC: 495, EM: 525/50; Leica) and a Cy3/Rhodamine excitation-emission band-pass filter cube (Ex:  
440 541/51, DC: 560, EM: 565/605; Leica). An incubation cage around the microscope kept  
441 temperatures constant at 37°C for *E. coli* and *S. maltophilia* experiments and at 28°C for  
442 experiments with *X. citri*. Several separate positions of each cell mixture were imaged every 10-  
443 15 min after auto-focusing using the LASX software package (Leica). Images were further  
444 processed with the FIJI software using the Bio-Formats plugin [61]. Time-lapse images were

445 visually scored for cell lysis events. Small groups of cells (approximately 2 to 8 cells per colony)  
446 containing a mixture of bacterial species in close contact with each other were tagged at time-point  
447 zero and followed during 100 min (*E. coli* and *S. maltophilia* competitions) or 300 min (*X. citri*  
448 and *S. maltophilia* competitions) and cell lysis events were manually registered. Approximately  
449 100 cells were scored for each assay.

#### 450 **BLASTp searches**

451 To identify putative effectors secreted by the *S. maltophilia* T4SS, we used the XVIPCDs  
452 of known and putative *X. citri* T4SS substrates (residues in parenthesis): *XAC4264*(140-279),  
453 *XAC3634*(189-306), *XAC3266*(735-861), *XAC2885*(271-395), *XAC2609*(315-431),  
454 *XAC1918*(477-606), *XAC1165*(1-112), *XAC0574*(317-440), *XAC0466*(488-584), *XAC0323*(16-  
455 136), *XAC0151*(120-254), *XAC0096*(506-646) [6, 22] to BLAST search the genome of *S.*  
456 *maltophilia* K279a (<https://www.genome.jp/tools/blast/>). A list of *S. maltophilia* proteins  
457 identified by each *X. citri* XVIPCD with their respective E-values is shown in S1 Table.

#### 458 **Recombinant protein expression, purification and SEC-MALS analysis**

459 Smlt3025<sub>86-333</sub> (residues between 86-333) and full-length Smlt3024 cloned into pSUMO  
460 were transformed into *E. coli* BL21(DE3) and SHuffle T7 competent *E. coli* cells (New England  
461 BioLabs), respectively, and subcultured into 2x YT medium supplemented with 50 µg/mL  
462 kanamycin at 37°C until OD<sub>600nm</sub> of 0.6 and then shifted to 18°C. After 30 min, protein production  
463 was induced with 0.1 mM IPTG. After overnight expression, cells were harvested by  
464 centrifugation and resuspended in 20 mM Tris-HCl (pH 8.0), 200 mM NaCl, 5 mM imidazole and  
465 lysed by 10 passages in a French Press system. The lysate soluble fraction was loaded onto a 5 ml  
466 HiTrap chelating HP column (GE Healthcare) immobilized with 100 mM cobalt chloride and  
467 equilibrated with the lysis buffer. After the removal of unbound proteins, the protein was eluted

468 with lysis buffer supplemented with 100 mM imidazole. Ulp1 was added to the eluted protein,  
469 followed by dialysis at 4°C for 12 h for removal of imidazol. The cleaved target proteins were  
470 purified after a second passage through the HiTrap chelating HP column immobilized with cobalt,  
471 being eluted in the unbound fraction. Molecular masses of the isolated proteins and the effector-  
472 immunity complex were determined by SEC-MALS (size-exclusion chromatography coupled to  
473 multi-angle light scattering), using a Superdex 200 10/300 GL (GE Healthcare) coupled to a Wyatt  
474 MALS detector. Graphs and the average molecular masses were generated using the ASTRA  
475 software (Wyatt), assuming a refractive index increment  $dn/dc = 0.185 \text{ mL/g}$ .

#### 476 **Secretion assay and immunoblot**

477 Secretion assays were performed essentially as previously described [6]. Briefly, *S.*  
478 *maltophilia* wild-type and  $\Delta virD4$  strains carrying pBRA-FLAG-*smlt3024* were grown overnight  
479 with antibiotics (150  $\mu\text{g/mL}$  streptomycin), subcultured on the next day (1:25 dilution) and grown  
480 for an additional 2 h at 37°C (200 rpm). *E. coli* cells were subcultured (1:100 dilution) in a similar  
481 manner. *S. maltophilia* and *E. coli* cells were washed with 2x YT,  $OD_{600\text{nm}}$  adjusted to 1.0, mixed  
482 1:1 volume and 5-10  $\mu\text{L}$  were spotted onto dry nitrocellulose membranes, which were quickly  
483 placed onto LB-agar plates containing 0.1% L-arabinose to induce the expression of FLAG-  
484 Smlt3024. Plates were incubated at 30°C for 6 h, sufficient to allow detection of secreted proteins  
485 and before spontaneous cell death, which would produce background in the dot blot. After 6 h,  
486 membranes were washed with 5% low-fat milk diluted in PBS containing 0.02% sodium azide and  
487 processed for quantitative dot blot analysis with anti-FLAG rabbit polyclonal antibody, followed  
488 by IRDye 800CW anti-rabbit IgG (LI-COR Biosciences) and scanned using an Odyssey CLx  
489 infrared imaging system (LI-COR Biosciences). To obtain good signal to noise ratios, the

490 membranes were washed in PBS/Tween (0.05%) at least four times for 1 h each. Quantification of  
491 signal intensity was performed using FIJI software [61].

492

### 493 **Acknowledgments**

494 We are grateful to Dr. Diorge Paulo Souza for critical discussions and Dr. Gabriel U. Oka  
495 for advice on the secretion assays. We thank Dr. Robert Ryan for providing the strain, Dr.  
496 Alexandre Bruni-Cardoso for fluorescence microscope access, Dr. Beny Spira, Dr. Maria Carolina  
497 Quecine Verdi and Dr. Frederico José Gueiros for plasmids, and Dr. Andre Luis Berteli Ambrosio  
498 for the SHuffle T7 competent *E. coli*.

499

### 500 **Funding**

501 This work was supported by São Paulo Research Foundation (FAPESP) grants to C.S.F.  
502 (2011/07777-5 and 2017/17303-7). FAPESP fellowships were awarded to E.B.-S. (2015/25381-2  
503 and 2018/04553-8), B.Y.M. (2016/00458-5) and W.C. (2015/18237-2). The authors declare no  
504 conflict of interest. The funders had no role in study design, data collection and analysis, decision  
505 to publish, or preparation of the manuscript.

506

### 507 **Author contributions:**

508 E.B.-S. and C.S.F. conceived the study. E.B.-S., W.C., B.Y.M. and C.S.F., designed  
509 experiments. E.B.-S., W.C., B.Y.M., G.D.S. and I.V.M. performed the experiments and all of the  
510 authors analysed the data. E.B.-S. and C.S.F. wrote the manuscript.

511

512



513 **Figure captions**

514 **Fig 1. *S. maltophilia* uses the VirB/T4SS to induce *E. coli* cell death.** (A) Schematic  
515 representation of the organization of the chromosomal *virB1-11* and *virD4* genes encoding the  
516 VirB/T4SSs of *S. maltophilia* K279a and *X. citri* 306. The amino acid sequence identities (%)  
517 between homologs are shown. (B) Bacterial competition assay using *S. maltophilia* strains (wild-  
518 type,  $\Delta virD4$  and complemented strains  $\Delta virD4 virD4^{C_{smlt}}$  and  $\Delta virD4 virD4^{C_{xac}}$  and *E. coli*  
519 (naturally expressing  $\beta$ -galactosidase). A serial dilution of *E. coli* (1:4) was mixed with constant  
520 amounts of *S. maltophilia*, spotted onto LB-agar containing IPTG and X-gal and incubated for 24  
521 h at 30°C. Representative image of three independent experiments. (C) Quantification of *E. coli*  
522 target cell lysis using the cell-impermeable compound CPRG. The same bacterial strains described  
523 in (B) were used. Graph represents the means and standard deviation (SD) of three independent  
524 experiments performed in triplicate. (D) Representative images of time-lapse microscopy showing  
525 wild-type *S. maltophilia* interacting with *E. coli-RFP* (upper panel) at the single cell level. Images  
526 were acquired every 10 min. Dead/lysed *E. coli* cells are indicated by white arrows. Interaction  
527 between *S. maltophilia*  $\Delta virD4$  and *E. coli-RFP* strains (lower panel) did not induce target cell  
528 lysis. Timestamps in hours:minutes. Scale bar 5  $\mu$ m. (E) Percentage of *E. coli* cells that died/lysed  
529 after cell-to-cell contact with *Stenotrophomonas* strains over a 100 min time-frame.

530 **Fig 2. *S. maltophilia* and *X. citri* use their T4SSs for reciprocal interbacterial**  
531 **competition.** (A) Representative images of time-lapse microscopy showing *S. maltophilia* wild-  
532 type and  $\Delta virD4$  strains interacting with the T4SS-deficient *X. citri*  $\Delta virB-GFP$  strain at the single  
533 cell level. Dead/lysed *X. citri*  $\Delta virB-GFP$  cells are indicated by white arrows. (B) *S. maltophilia*  
534 wild-type and  $\Delta virD4$  strains interacting with the functional T4SS *X. citri-GFP* strain at the single  
535 cell level. Dead/lysed *X. citri* cells are indicated by white arrows and dead/lysed *S. maltophilia*



536 cells are indicated by yellow arrows. Scale bar 5  $\mu$ m. Images were acquired every 15 min. (C)  
537 Percentage (%) of T4SS-deficient *X. citri* cells that lysed after cell-to-cell contact with *S.*  
538 *maltophilia* cells. (D) Percentage (%) of *X. citri* cells that lysed after cell-to-cell contact with *S.*  
539 *maltophilia* cells (left side) and % of *S. maltophilia* cells that lysed after cell-to-cell contact with  
540 *X. citri* cells (right side). Cells were counted per interaction over a 300 min time-frame.

541 **Fig 3. New putative type 4 effectors (Tfes) and type 4 immunity proteins (Tfis) of *S.***  
542 ***maltophilia* T4SS.** (A) Schematic representation of size and domain architectures of new *S.*  
543 *maltophilia* T4SS substrates identified via BLASTp search using XVIPCD (*Xanthomonas* VirD4-  
544 interacting protein conserved domain) of *X. citri* T4SS effectors. Gene entries are shown for both  
545 effectors and immunity proteins. AHH: putative nuclease domain; PGB: peptidoglycan-binding  
546 domain. (B) Alignment of the XVIPCDs of the identified *S. maltophilia* effectors using Clustal  
547 Omega [62] and consensus sequence logo generated by WebLogo [63] showing several highly  
548 conserved amino acids that match conserved residues of the *X. citri* XVIPCDs [22].

549 **Fig 4. *Smlt3024* and *smlt3025* encode a Tfe-Tfi pair of *S. maltophilia* VirB/T4SS.** (A)  
550 Schematic representation of *smlt3024* and *smlt3025* genomic organization. (B) Secretion assay  
551 showing T4SS-dependent and *E. coli* contact-dependent secretion of FLAG-Smlt3024.  
552 Representative image of three independent experiments. (C) Densitometry of quantitative dot blot  
553 analysis signals shown in (B). Signal intensity detected for *S. maltophilia* mixed with *E. coli* were  
554 normalized by the background signal detected for *S. maltophilia* alone. (D) Amino acid sequence  
555 of X-Tfe/X-Tfi pair Smlt3024 and Smlt3025 as annotated in *S. maltophilia* str. *K279a* genome  
556 (GenBank AM743169). *Top panel*: The amino acid sequence of Smlt3024. Coloured in blue is the  
557 XVIPCD with the most conserved amino acids in bold. Methionine (M) residues at positions 1,  
558 13, 45, 47 and 50 are shown in red. Note that experimental evidence presented in this study

559 suggests that the correct start codon is located at Met45, Met47 or Met50. The predicted  
560 periplasmic localization peptide of Smlt3025 beginning at Met45 is shaded in grey with cleavage  
561 predicted at the underlined cysteine. (E) Left panel: SEC-MALS analysis showing the formation  
562 of a stable complex between Smlt3024 and Smlt3025<sub>86-333</sub>. The continuous line corresponds to the  
563 normalized differential refractive index, and the spotted lines indicate the calculated molecular  
564 mass. *Right panel*: SDS-PAGE showing the apparent molecular mass of proteins eluted from  
565 different SEC peaks. (F) Serial dilution (10-fold) of *E. coli* strains containing pBRA and pEXT22  
566 constructs as indicated, spotted on LB-agar plates containing either 0.2% D-glucose, 0.2% L-  
567 arabinose, 200  $\mu$ M IPTG or both, showing growth inhibition of periplasmic Smlt3024 and the  
568 three versions of Smlt3025 starting in three different start codons (Smlt3025, Smlt3025<sub>13-333</sub> and  
569 Smlt3025<sub>45-333</sub>). (G) Time-lapse imaging of single cells expressing pBRA-*pelB-smlt3024* show  
570 reduced growth rates and smaller cell-sizes (L-arabinose) compared to the non-induced (D-  
571 glucose) and empty plasmid controls. Images were acquired every 10 min. Timestamps in  
572 hours:minutes. Scale bar 5  $\mu$ m.

573

## 574 **References**

- 575 1. Garcia-Bayona L, Comstock LE (2018). Bacterial antagonism in host-associated microbial  
576 communities. *Science* 361.
- 577 2. Aoki SK, Pamma R, Hernday AD, Bickham JE, Braaten BA, Low DA (2005). Contact-  
578 dependent inhibition of growth in *Escherichia coli*. *Science* 309: 1245-8.
- 579 3. Aoki SK, Diner EJ, de Roodenbeke CT, Burgess BR, Poole SJ, Braaten BA, et al. (2010).  
580 A widespread family of polymorphic contact-dependent toxin delivery systems in bacteria.  
581 *Nature* 468: 439-42.
- 582 4. Pukatzki S, Ma AT, Revel AT, Sturtevant D, Mekalanos JJ (2007). Type VI secretion  
583 system translocates a phage tail spike-like protein into target cells where it cross-links  
584 actin. *Proc Natl Acad Sci U S A* 104: 15508-13.
- 585 5. Pukatzki S, Ma AT, Sturtevant D, Krastins B, Sarracino D, Nelson WC, et al. (2006).  
586 Identification of a conserved bacterial protein secretion system in *Vibrio cholerae* using  
587 the *Dictyostelium* host model system. *Proc Natl Acad Sci U S A* 103: 1528-33.

- 588 6. Souza DP, Oka GU, Alvarez-Martinez CE, Bisson-Filho AW, Dunger G, Hobeika L, et al.  
589 (2015). Bacterial killing via a type IV secretion system. *Nat Commun* 6: 6453.
- 590 7. Grohmann E, Christie PJ, Waksman G, Backert S (2018). Type IV secretion in Gram-  
591 negative and Gram-positive bacteria. *Mol Microbiol* 107: 455-471.
- 592 8. Cascales E, Christie PJ (2003). The versatile bacterial type IV secretion systems. *Nat Rev*  
593 *Microbiol* 1: 137-49.
- 594 9. Christie PJ, Vogel JP (2000). Bacterial type IV secretion: conjugation systems adapted to  
595 deliver effector molecules to host cells. *Trends Microbiol* 8: 354-60.
- 596 10. Sexton JA, Vogel JP (2002). Type IVB secretion by intracellular pathogens. *Traffic* 3: 178-  
597 85.
- 598 11. Guglielmini J, Neron B, Abby SS, Garcillan-Barcia MP, de la Cruz F, Rocha EP (2014).  
599 Key components of the eight classes of type IV secretion systems involved in bacterial  
600 conjugation or protein secretion. *Nucleic Acids Res* 42: 5715-27.
- 601 12. Guglielmini J, de la Cruz F, Rocha EP (2013). Evolution of conjugation and type IV  
602 secretion systems. *Mol Biol Evol* 30: 315-31.
- 603 13. Pitzschke A, Hirt H (2010). New insights into an old story: *Agrobacterium*-induced tumour  
604 formation in plants by plant transformation. *EMBO J* 29: 1021-32.
- 605 14. Waksman G (2019). From conjugation to T4S systems in Gram-negative bacteria: a  
606 mechanistic biology perspective. *EMBO Rep* doi:10.15252/embr.201847012.
- 607 15. Christie PJ (2016). The Mosaic Type IV Secretion Systems. *EcoSal Plus* 7.
- 608 16. Chandran Darbari V, Waksman G (2015). Structural Biology of Bacterial Type IV  
609 Secretion Systems. *Annu Rev Biochem* 84: 603-29.
- 610 17. Souza DP, Andrade MO, Alvarez-Martinez CE, Arantes GM, Farah CS, Salinas RK  
611 (2011). A component of the Xanthomonadaceae type IV secretion system combines a  
612 VirB7 motif with a N0 domain found in outer membrane transport proteins. *PLoS Pathog*  
613 7: e1002031.
- 614 18. Sgro GG, Costa TRD, Cenens W, Souza DP, Cassago A, Coutinho de Oliveira L, et al.  
615 (2018). Cryo-EM structure of the bacteria-killing type IV secretion system core complex  
616 from *Xanthomonas citri*. *Nat Microbiol* 3: 1429-1440.
- 617 19. Nagai H, Roy CR (2001). The DotA protein from *Legionella pneumophila* is secreted by a  
618 novel process that requires the Dot/Icm transporter. *EMBO J* 20: 5962-70.
- 619 20. Burns DL (2003). Type IV transporters of pathogenic bacteria. *Curr Opin Microbiol* 6: 29-  
620 34.
- 621 21. Cascales E, Christie PJ (2004). Definition of a bacterial type IV secretion pathway for a  
622 DNA substrate. *Science* 304: 1170-3.
- 623 22. Alegria MC, Souza DP, Andrade MO, Docena C, Khater L, Ramos CH, et al. (2005).  
624 Identification of new protein-protein interactions involving the products of the  
625 chromosome- and plasmid-encoded type IV secretion loci of the phytopathogen  
626 *Xanthomonas axonopodis* pv. *citri*. *J Bacteriol* 187: 2315-25.
- 627 23. Jamet A, Nassif X (2015). New players in the toxin field: polymorphic toxin systems in  
628 bacteria. *MBio* 6: e00285-15.
- 629 24. Ryan RP, Monchy S, Cardinale M, Taghavi S, Crossman L, Avison MB, et al. (2009). The  
630 versatility and adaptation of bacteria from the genus *Stenotrophomonas*. *Nat Rev Microbiol*  
631 7: 514-25.
- 632 25. Brooke JS (2012). *Stenotrophomonas maltophilia*: an emerging global opportunistic  
633 pathogen. *Clin Microbiol Rev* 25: 2-41.

- 634 26. Adegoke AA, Stenstrom TA, Okoh AI (2017). *Stenotrophomonas maltophilia* as an  
635 Emerging Ubiquitous Pathogen: Looking Beyond Contemporary Antibiotic Therapy. *Front*  
636 *Microbiol* 8: 2276.
- 637 27. Pompilio A, Crocetta V, Confalone P, Nicoletti M, Petrucca A, Guarnieri S, et al. (2010).  
638 Adhesion to and biofilm formation on IB3-1 bronchial cells by *Stenotrophomonas*  
639 *maltophilia* isolates from cystic fibrosis patients. *BMC Microbiol* 10: 102.
- 640 28. Pompilio A, Pomponio S, Crocetta V, Gherardi G, Verginelli F, Fiscarelli E, et al. (2011).  
641 Phenotypic and genotypic characterization of *Stenotrophomonas maltophilia* isolates from  
642 patients with cystic fibrosis: genome diversity, biofilm formation, and virulence. *BMC*  
643 *Microbiol* 11: 159.
- 644 29. DuMont AL, Karaba SM, Cianciotto NP (2015). Type II Secretion-Dependent Degradative  
645 and Cytotoxic Activities Mediated by *Stenotrophomonas maltophilia* Serine Proteases  
646 *StmPr1* and *StmPr2*. *Infect Immun* 83: 3825-37.
- 647 30. Karaba SM, White RC, Cianciotto NP (2013). *Stenotrophomonas maltophilia* encodes a  
648 type II protein secretion system that promotes detrimental effects on lung epithelial cells.  
649 *Infect Immun* 81: 3210-9.
- 650 31. Berg G, Roskot N, Smalla K (1999). Genotypic and phenotypic relationships between  
651 clinical and environmental isolates of *Stenotrophomonas maltophilia*. *J Clin Microbiol* 37:  
652 3594-600.
- 653 32. Crossman LC, Gould VC, Dow JM, Vernikos GS, Okazaki A, Sebahia M, et al. (2008).  
654 The complete genome, comparative and functional analysis of *Stenotrophomonas*  
655 *maltophilia* reveals an organism heavily shielded by drug resistance determinants. *Genome*  
656 *Biol* 9: R74.
- 657 33. Bi D, Liu L, Tai C, Deng Z, Rajakumar K, Ou HY (2013). SecReT4: a web-based bacterial  
658 type IV secretion system resource. *Nucleic Acids Res* 41: D660-5.
- 659 34. Schuster CF, Bertram R (2013). Toxin-antitoxin systems are ubiquitous and versatile  
660 modulators of prokaryotic cell fate. *Fems Microbiology Letters* 340: 73-85.
- 661 35. El-Gebali S, Mistry J, Bateman A, Eddy SR, Luciani A, Potter SC, et al. (2019). The Pfam  
662 protein families database in 2019. *Nucleic Acids Res* 47: D427-D432.
- 663 36. Petersen TN, Brunak S, von Heijne G, Nielsen H (2011). SignalP 4.0: discriminating signal  
664 peptides from transmembrane regions. *Nat Methods* 8: 785-6.
- 665 37. Sanchez MB (2015). Antibiotic resistance in the opportunistic pathogen *Stenotrophomonas*  
666 *maltophilia*. *Front Microbiol* 6: 658.
- 667 38. Borgeaud S, Metzger LC, Scignari T, Blokesch M (2015). The type VI secretion system  
668 of *Vibrio cholerae* fosters horizontal gene transfer. *Science* 347: 63-7.
- 669 39. Sana TG, Flaugnatti N, Lugo KA, Lam LH, Jacobson A, Baylot V, et al. (2016). *Salmonella*  
670 *Typhimurium* utilizes a T6SS-mediated antibacterial weapon to establish in the host gut.  
671 *Proc Natl Acad Sci U S A* 113: E5044-51.
- 672 40. Anderson MC, Vonaesch P, Saffarian A, Marteyn BS, Sansonetti PJ (2017). *Shigella*  
673 *sonnei* Encodes a Functional T6SS Used for Interbacterial Competition and Niche  
674 Occupancy. *Cell Host Microbe* 21: 769-776 e3.
- 675 41. Pompilio A, Crocetta V, Ghosh D, Chakrabarti M, Gherardi G, Vitali LA, et al. (2016).  
676 *Stenotrophomonas maltophilia* Phenotypic and Genotypic Diversity during a 10-year  
677 Colonization in the Lungs of a Cystic Fibrosis Patient. *Front Microbiol* 7: 1551.

- 678 42. Brooke JS, Di Bonaventura G, Berg G, Martinez JL (2017). Editorial: A Multidisciplinary  
679 Look at *Stenotrophomonas maltophilia*: An Emerging Multi-Drug-Resistant Global  
680 Opportunistic Pathogen. *Front Microbiol* 8: 1511.
- 681 43. Rouf R, Karaba SM, Dao J, Cianciotto NP (2011). *Stenotrophomonas maltophilia* strains  
682 replicate and persist in the murine lung, but to significantly different degrees. *Microbiology*  
683 157: 2133-42.
- 684 44. Di Bonaventura G, Pompilio A, Zappacosta R, Petrucci F, Fiscarelli E, Rossi C, et al.  
685 (2010). Role of excessive inflammatory response to *Stenotrophomonas maltophilia* lung  
686 infection in DBA/2 mice and implications for cystic fibrosis. *Infect Immun* 78: 2466-76.
- 687 45. Alcoforado Diniz J, Liu YC, Coulthurst SJ (2015). Molecular weaponry: diverse effectors  
688 delivered by the Type VI secretion system. *Cell Microbiol* 17: 1742-51.
- 689 46. Tang JY, Bullen NP, Ahmad S, Whitney JC (2018). Diverse NADase effector families  
690 mediate interbacterial antagonism via the type VI secretion system. *J Biol Chem* 293: 1504-  
691 1514.
- 692 47. Ting SY, Bosch DE, Mangiameli SM, Radey MC, Huang S, Park YJ, et al. (2018).  
693 Bifunctional Immunity Proteins Protect Bacteria against FtsZ-Targeting ADP-  
694 Ribosylating Toxins. *Cell* 175: 1380-1392 e14.
- 695 48. LaCourse KD, Peterson SB, Kulasekara HD, Radey MC, Kim J, Mougous JD (2018).  
696 Conditional toxicity and synergy drive diversity among antibacterial effectors. *Nat*  
697 *Microbiol* 3: 440-446.
- 698 49. Durand E, Cambillau C, Cascales E, Journet L (2014). VgrG, Tae, Tle, and beyond: the  
699 versatile arsenal of Type VI secretion effectors. *Trends Microbiol* 22: 498-507.
- 700 50. Whitney JC, Quentin D, Sawai S, LeRoux M, Harding BN, Ledvina HE, et al. (2015). An  
701 interbacterial NAD(P)(+) glycohydrolase toxin requires elongation factor Tu for delivery  
702 to target cells. *Cell* 163: 607-19.
- 703 51. Russell AB, Peterson SB, Mougous JD (2014). Type VI secretion system effectors: poisons  
704 with a purpose. *Nat Rev Microbiol* 12: 137-48.
- 705 52. Si F, Li D, Cox SE, Sauls JT, Azizi O, Sou C, et al. (2017). Invariance of Initiation Mass  
706 and Predictability of Cell Size in *Escherichia coli*. *Curr Biol* 27: 1278-1287.
- 707 53. da Silva AC, Ferro JA, Reinach FC, Farah CS, Furlan LR, Quaggio RB, et al. (2002).  
708 Comparison of the genomes of two *Xanthomonas* pathogens with differing host  
709 specificities. *Nature* 417: 459-63.
- 710 54. Hayashi K, Morooka N, Yamamoto Y, Fujita K, Isono K, Choi S, et al. (2006). Highly  
711 accurate genome sequences of *Escherichia coli* K-12 strains MG1655 and W3110. *Mol*  
712 *Syst Biol* 2: 2006 0007.
- 713 55. Hoang TT, Karkhoff-Schweizer RR, Kutchma AJ, Schweizer HP (1998). A broad-host-  
714 range Flp-FRT recombination system for site-specific excision of chromosomally-located  
715 DNA sequences: application for isolation of unmarked *Pseudomonas aeruginosa* mutants.  
716 *Gene* 212: 77-86.
- 717 56. Welker E, Domfeh Y, Tyagi D, Sinha S, Fisher N (2015). Genetic Manipulation of  
718 *Stenotrophomonas maltophilia*. *Curr Protoc Microbiol* 37: 6F 2 1-14.
- 719 57. Dykxhoorn DM, St Pierre R, Linn T (1996). A set of compatible tac promoter expression  
720 vectors. *Gene* 177: 133-6.
- 721 58. Hachani A, Lossi NS, Filloux A (2013). A visual assay to monitor T6SS-mediated bacterial  
722 competition. *J Vis Exp* doi:10.3791/50103: e50103.



- 723 59. Vettiger A, Basler M (2016). Type VI Secretion System Substrates Are Transferred and  
724 Reused among Sister Cells. *Cell* 167: 99-110 e12.
- 725 60. Ginestet C (2011). ggplot2: Elegant Graphics for Data Analysis. *Journal of the Royal*  
726 *Statistical Society Series a-Statistics in Society* 174: 245-245.
- 727 61. Schindelin J, Arganda-Carreras I, Frise E, Kaynig V, Longair M, Pietzsch T, et al. (2012).  
728 Fiji: an open-source platform for biological-image analysis. *Nat Methods* 9: 676-82.
- 729 62. Sievers F, Higgins DG (2018). Clustal Omega for making accurate alignments of many  
730 protein sequences. *Protein Science* 27: 135-145.
- 731 63. Crooks GE, Hon G, Chandonia JM, Brenner SE (2004). WebLogo: A sequence logo  
732 generator. *Genome Research* 14: 1188-1190.
- 733 64. Kumar S, Stecher G, Tamura K (2016). MEGA7: Molecular Evolutionary Genetics  
734 Analysis Version 7.0 for Bigger Datasets. *Mol Biol Evol* 33: 1870-4.
- 735 65. El Yacoubi B, Brunings AM, Yuan Q, Shankar S, Gabriel DW (2007). In planta horizontal  
736 transfer of a major pathogenicity effector gene. *Appl Environ Microbiol* 73: 1612-21.

737

## 738 **Supporting information**

739 **S1 Fig. Phylogenetic distribution of *S. maltophilia* K279a T4SSs.** Maximum-likelihood  
740 tree with 1000 bootstrap replicates built with amino acid sequence of VirD4 (*Smlt3008*) homologs  
741 using MEGA 7.0 [64]. VirB/T4SSs from *S. maltophilia* and *X. citri* [6] involved in interbacterial  
742 competition are highlighted in orange. Trb/T4SS from *S. maltophilia* is in green and the  
743 VirB/T4SS involved in conjugation [65] encoded by the pXAC64 plasmid from *X. citri* strain 306  
744 is in blue [22].

745 **S2 Fig. Loading control for secretion assay.** SDS-PAGE of total protein extracts  
746 followed by western blot of *S. maltophilia* strains carrying pBRA-FLAG-*smlt3024* or empty  
747 pBRA. RnhA (Ribonuclease HI) was used as loading control.

748 **S1 Movie. Time-lapse microscopy showing *S. maltophilia* wild-type interacting with**  
749 ***E. coli-RFP*.** Dead/lysed *E. coli* cells are indicated by white arrows. Images were acquired every  
750 10 min. Timestamps in hours:minutes. Scale bar 5  $\mu$ m

751 **S2 Movie. Time-lapse microscopy showing *S. maltophilia*  $\Delta$ *virD4* interacting with *E.***  
752 ***coli-RFP*.** Images were acquired every 10 min. Timestamps in hours:minutes. Scale bar 5  $\mu$ m

753           **S3 Movie. Time-lapse microscopy showing *S. maltophilia* wild-type interacting with**  
754 ***X. citri*  $\Delta$ *virB-GFP*.** Dead/lysed *X. citri* cells are indicated by white arrows. Images were acquired  
755 every 15 min. Timestamps in hours:minutes. Scale bar 5  $\mu$ m

756           **S4 Movie. Time-lapse microscopy showing *S. maltophilia*  $\Delta$ *virD4* interacting with *X. citri***  
757  **$\Delta$ *virB-GFP*.** Images were acquired every 15 min. Timestamps in hours:minutes. Scale bar 5  $\mu$ m

758           **S5 Movie. Time-lapse microscopy showing *S. maltophilia* wild-type interacting with**  
759 ***X. citri-GFP*.** Dead/lysed *X. citri* cells are indicated by white arrows and dead/lysed *S. maltophilia*  
760 cells are indicated by yellow arrows. Images were acquired every 15 min. Timestamps in  
761 hours:minutes. Scale bar 5  $\mu$ m

762           **S6 Movie. Time-lapse microscopy showing *S. maltophilia*  $\Delta$ *virD4* interacting with *X.***  
763 ***citri-GFP*.** Dead/lysed *S. maltophilia* cells are indicated by yellow arrows. Images were acquired  
764 every 15 min. Timestamps in hours:minutes. Scale bar 5  $\mu$ m

765           **S7 Movie. Time-lapse microscopy showing *E. coli* cells containing the empty pBRA**  
766 **plasmid grown with 0.2% L-arabinose.** Images were acquired every 10 min. Scale bar 5  $\mu$ m.

767           **S8 Movie. Time-lapse microscopy showing *E. coli* cells containing pBRA-*pelB-***  
768 ***smlt3024* grown with 0.2% D-glucose.** Images were acquired every 10 min. Scale bar 5  $\mu$ m.

769           **S9 Movie. Time-lapse microscopy showing *E. coli* cells containing pBRA-*pelB-***  
770 ***smlt3024* grown with 0.2% L-arabinose.** Images were acquired every 10 min. Scale bar 5  $\mu$ m.

771           **S1 Table. List of putative *S. maltophilia* T4SS X-Tfe/X-Tfi pairs identified by**  
772 **BLASTp search using *X. citri* XVIPCDs.**

773           **S2 Table. List of strains, primers and plasmids used in this study.**

(A)

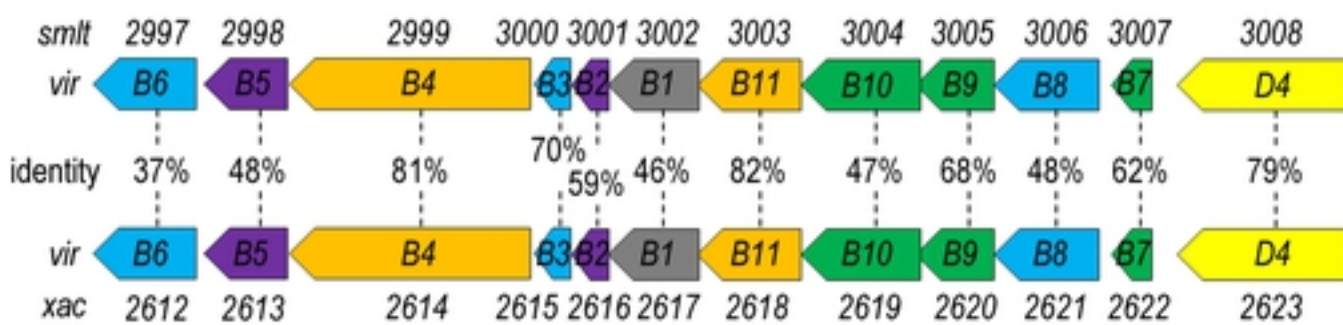

(B)

bioRxiv preprint doi: <https://doi.org/10.1101/557322>; this version posted February 21, 2019. The copyright holder for this preprint (which was not certified by peer review) is the author/funder, who has granted bioRxiv a license to display the preprint in perpetuity. It is made available under aCC-BY 4.0 International license.

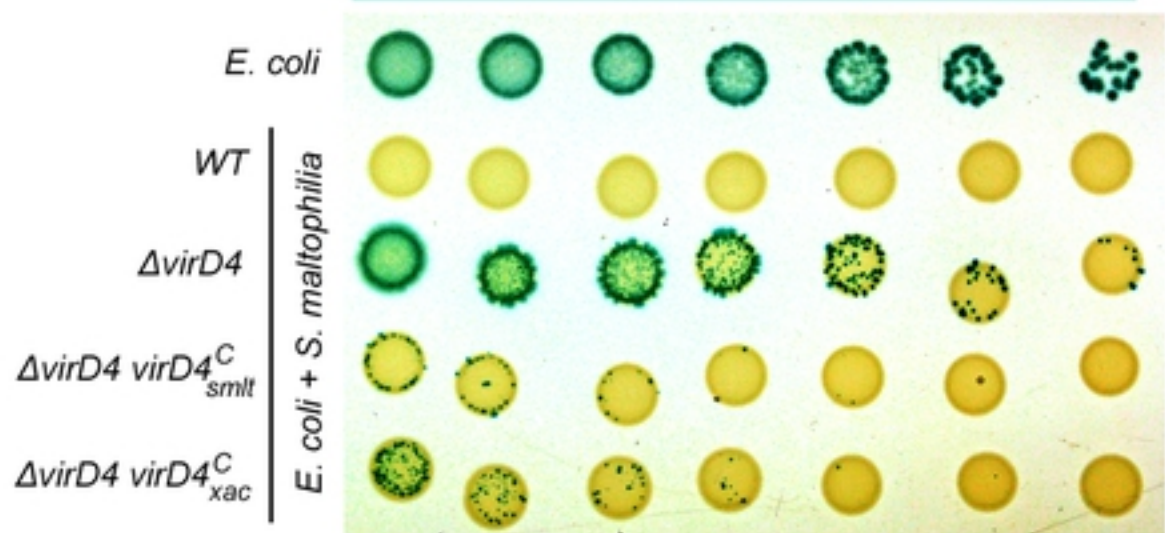

(C)

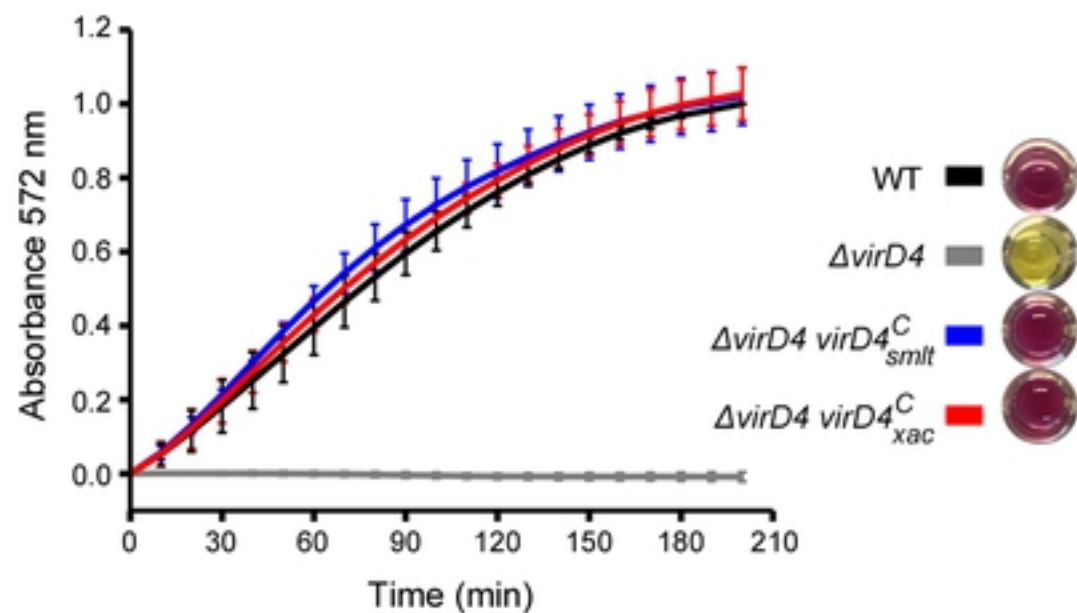

(D)

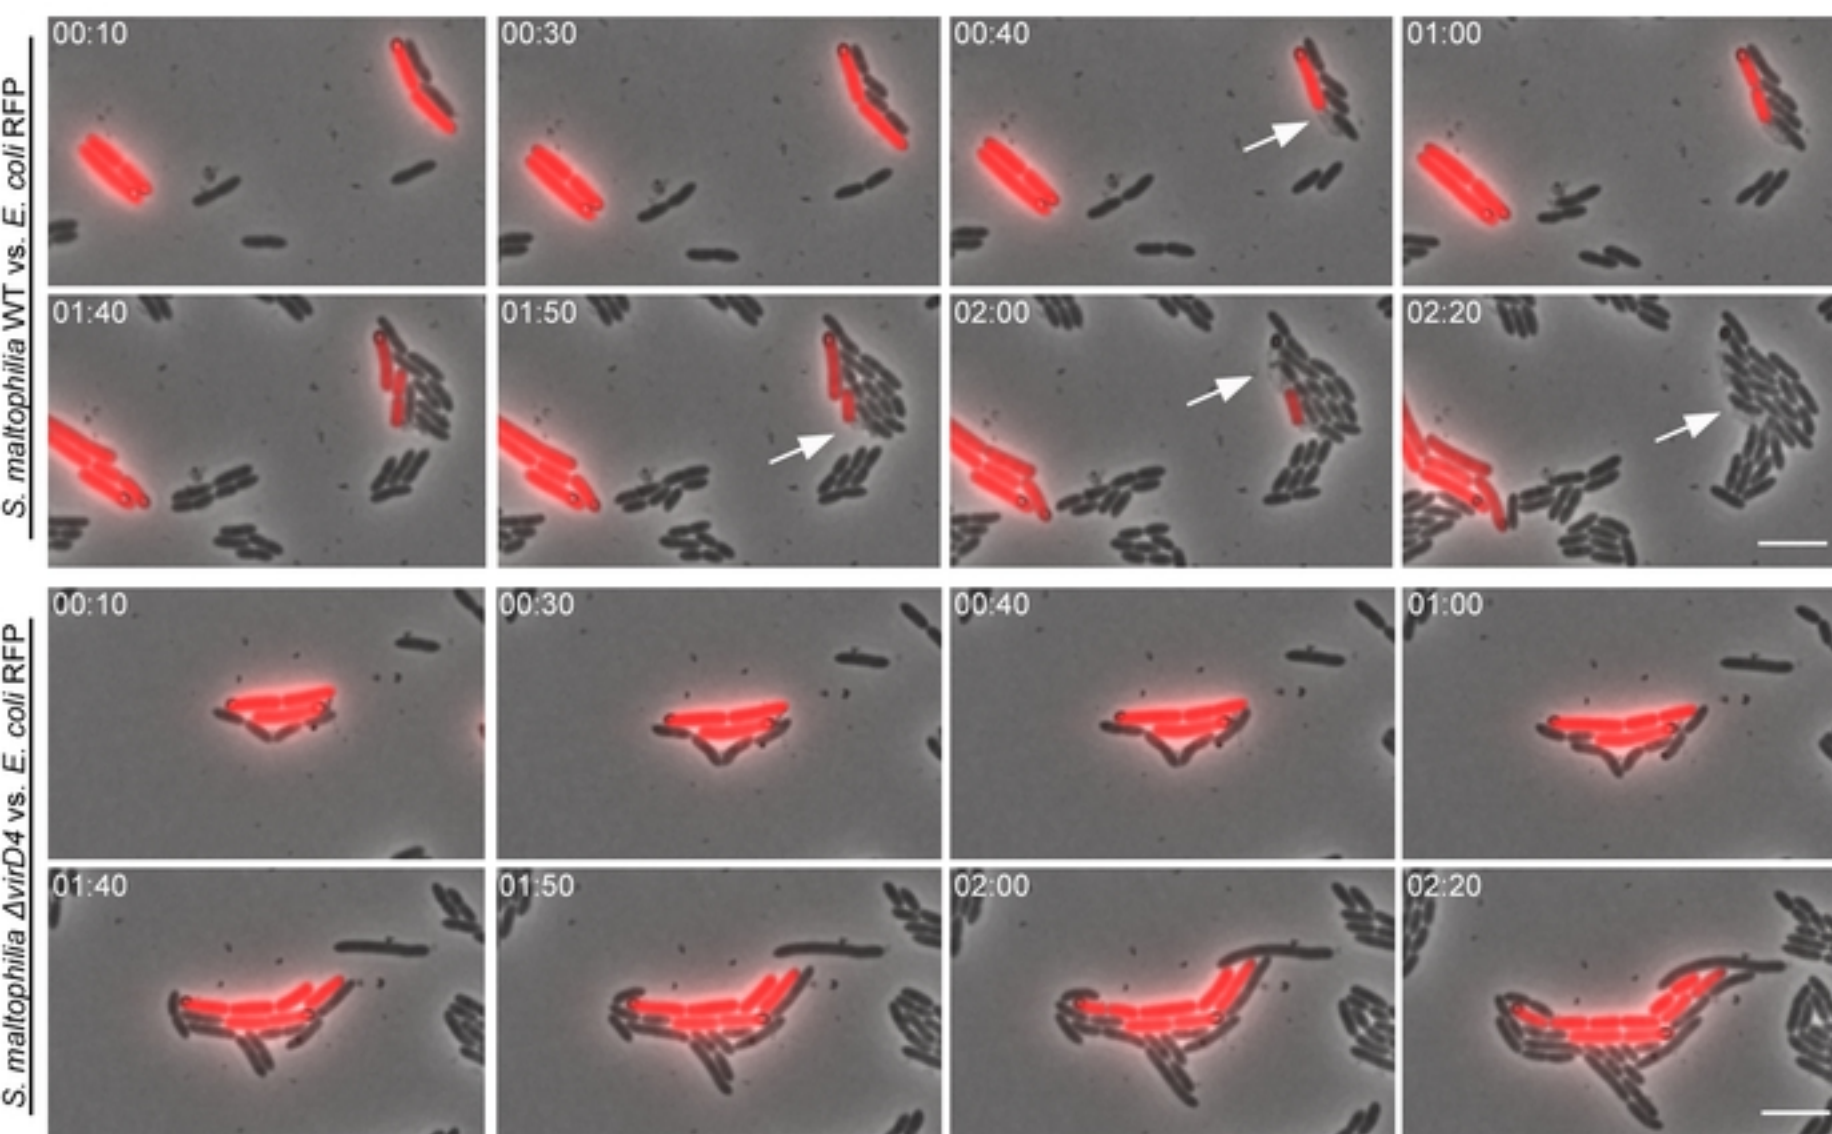

(E)

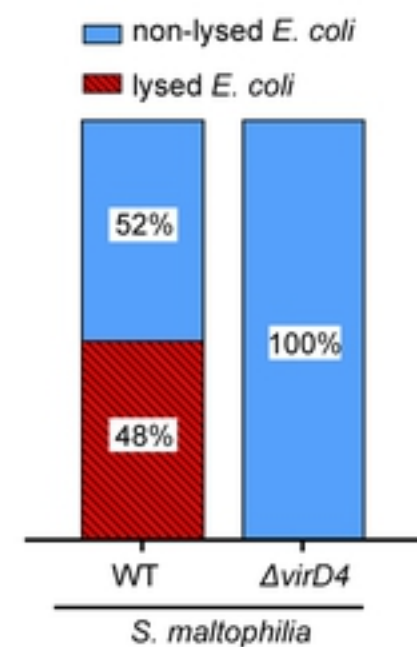

Figure 1



(A)

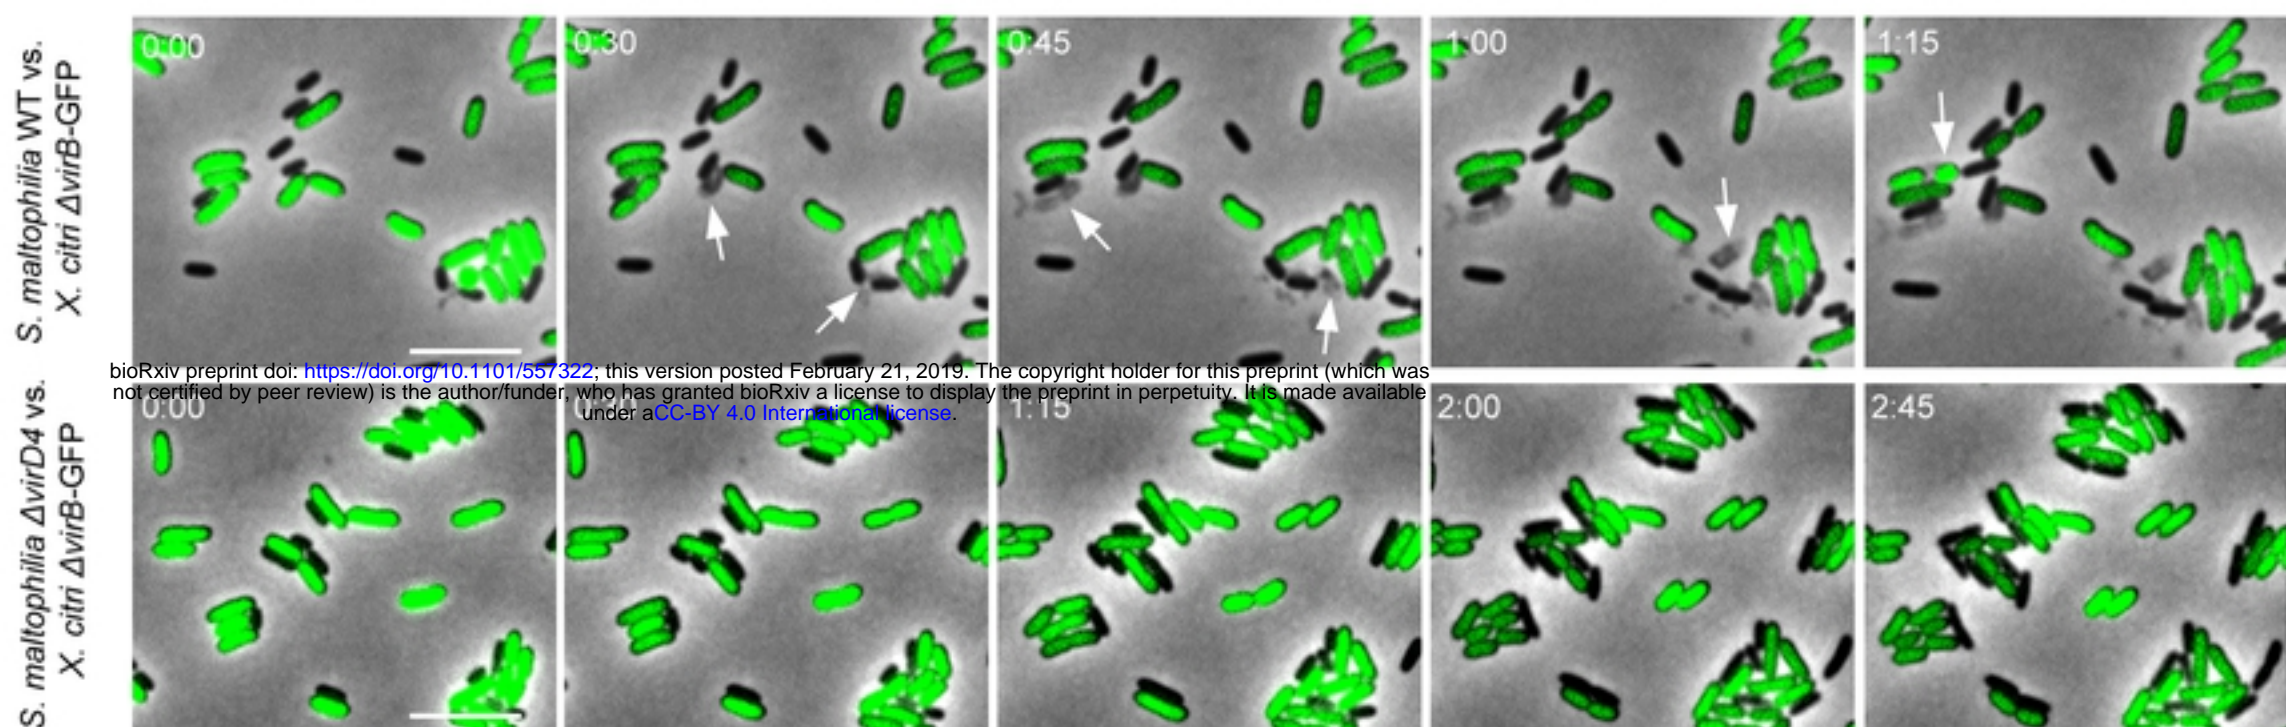

(B)

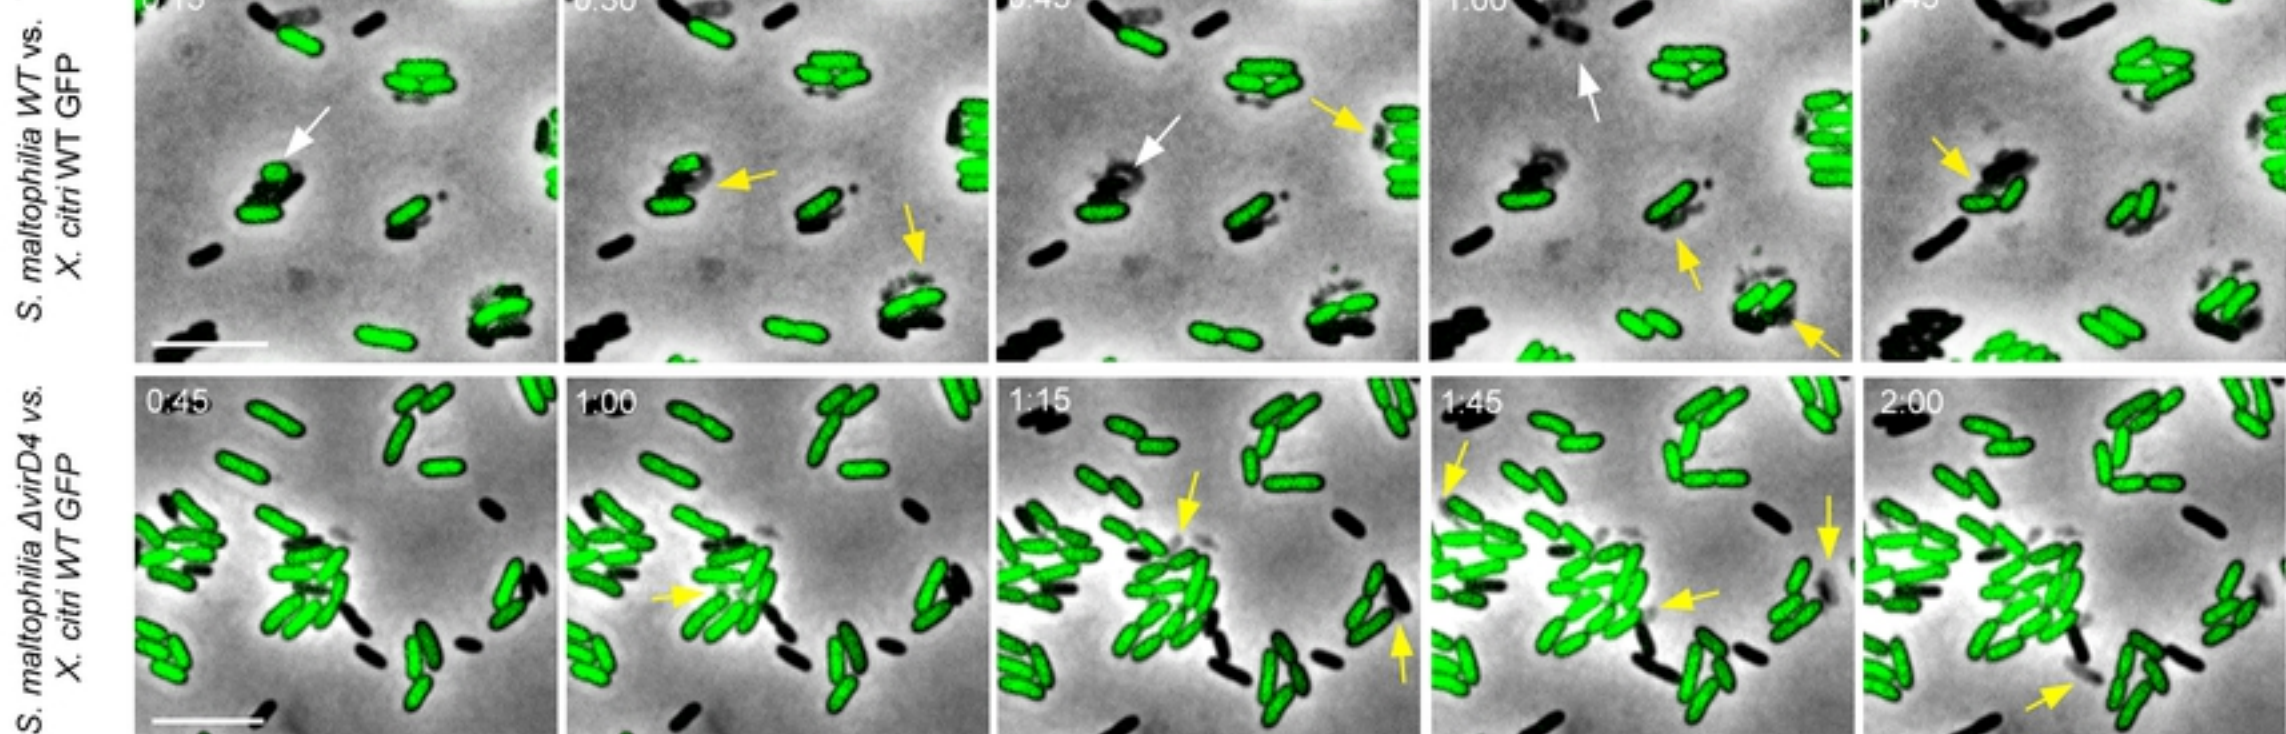

(C)

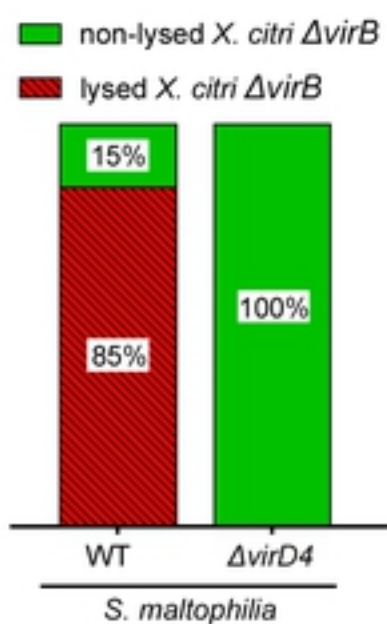

(D)

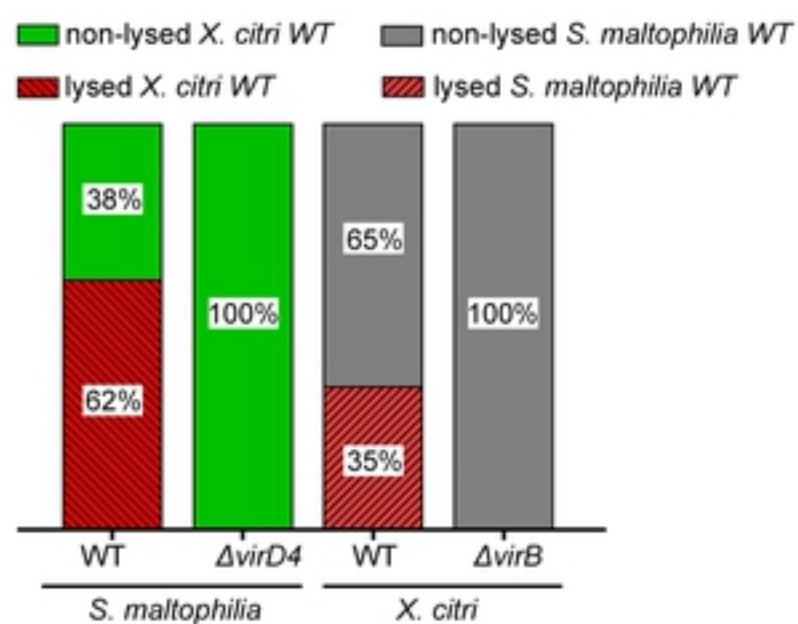

Figure 2



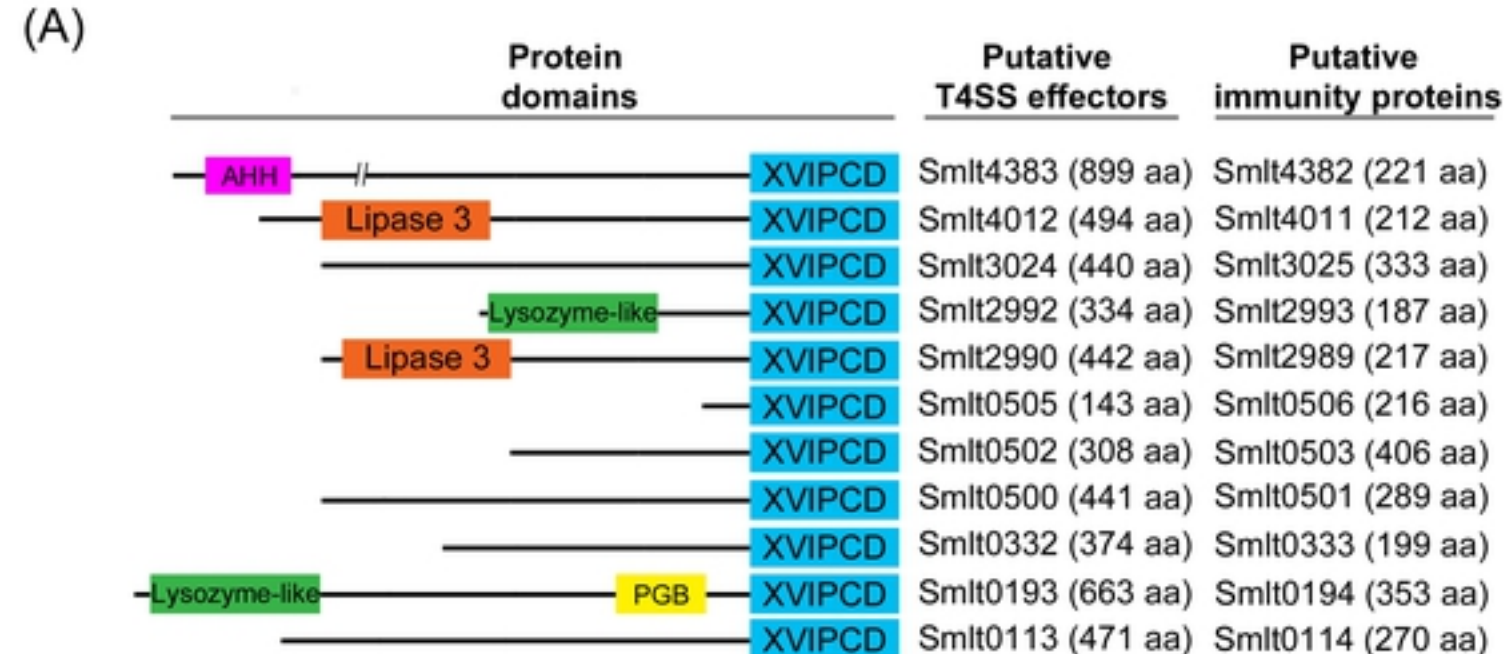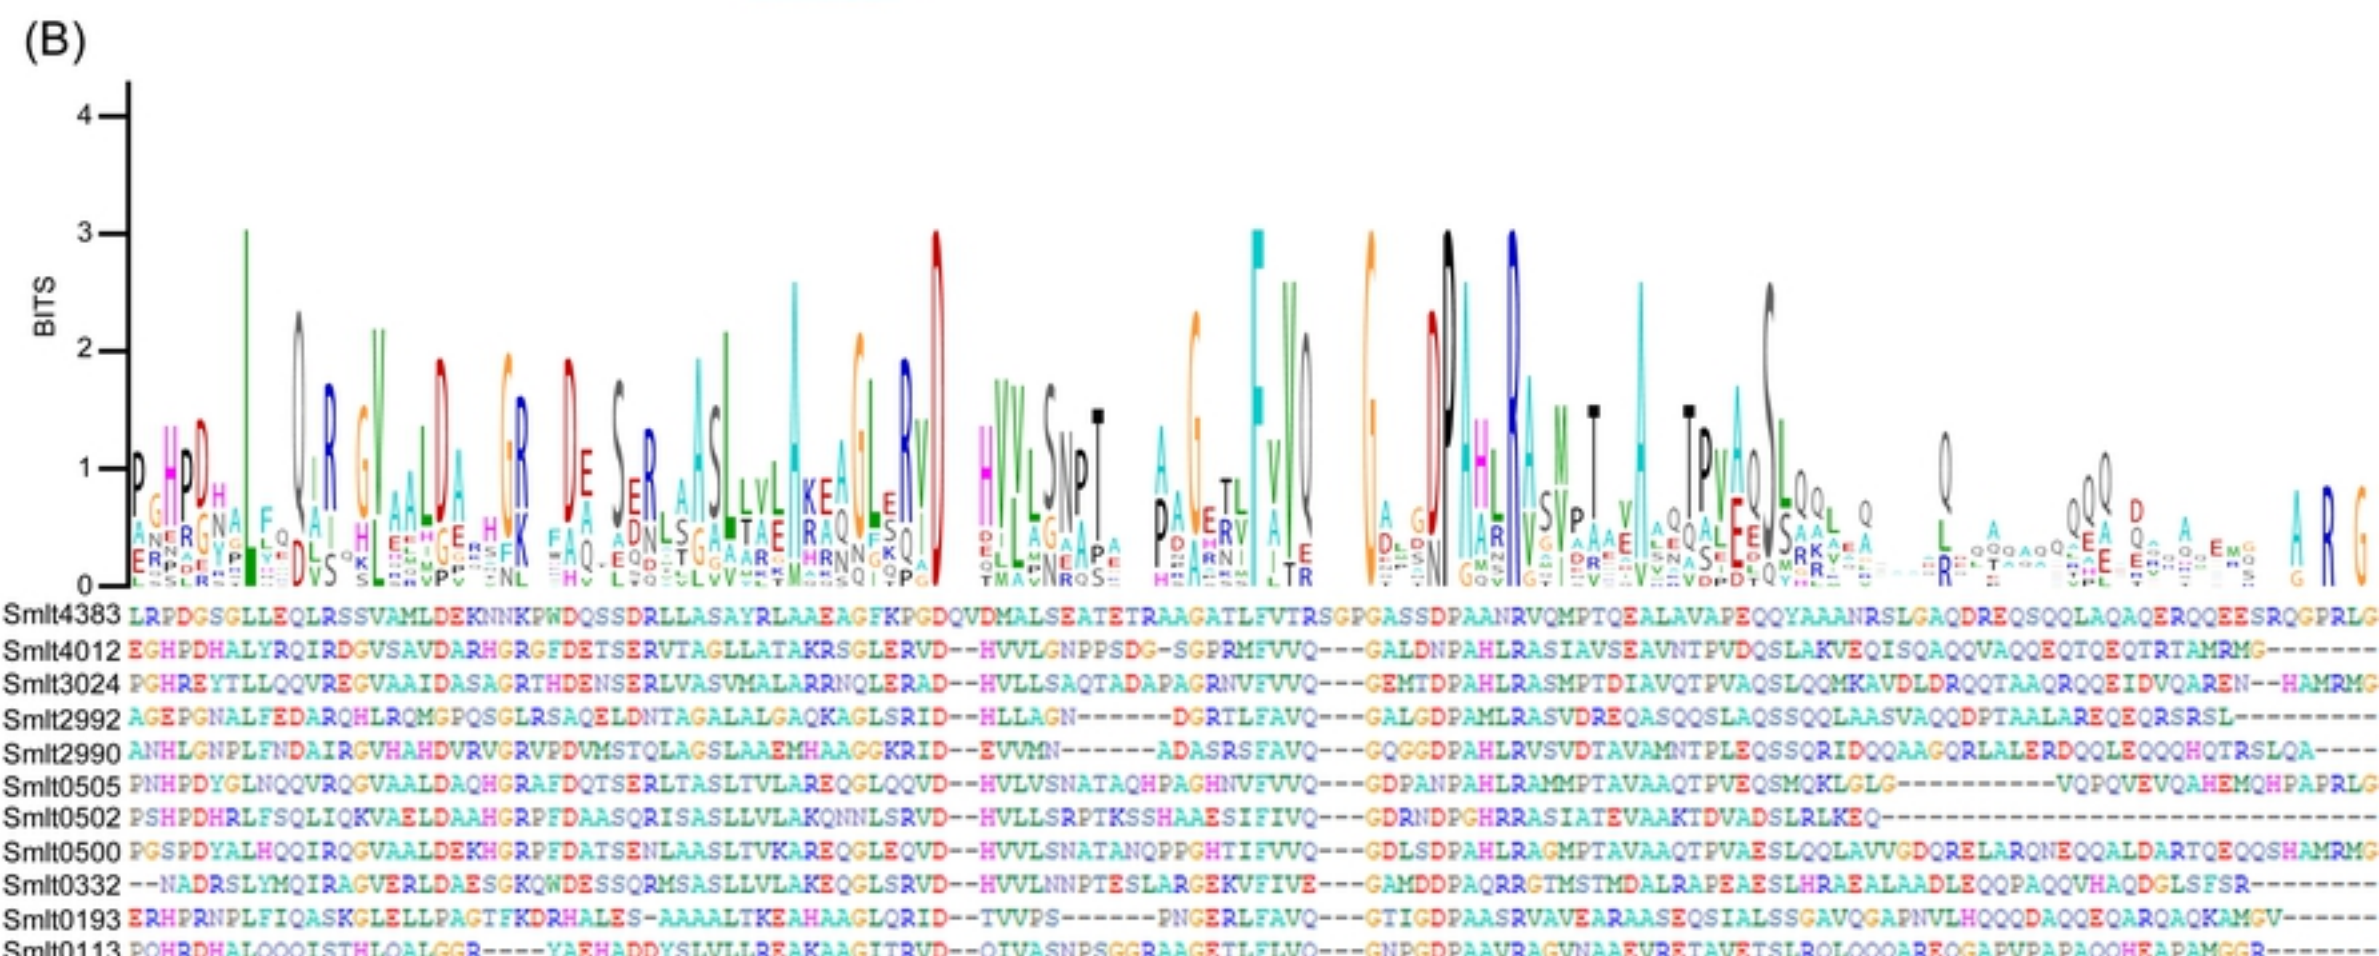

Figure 3



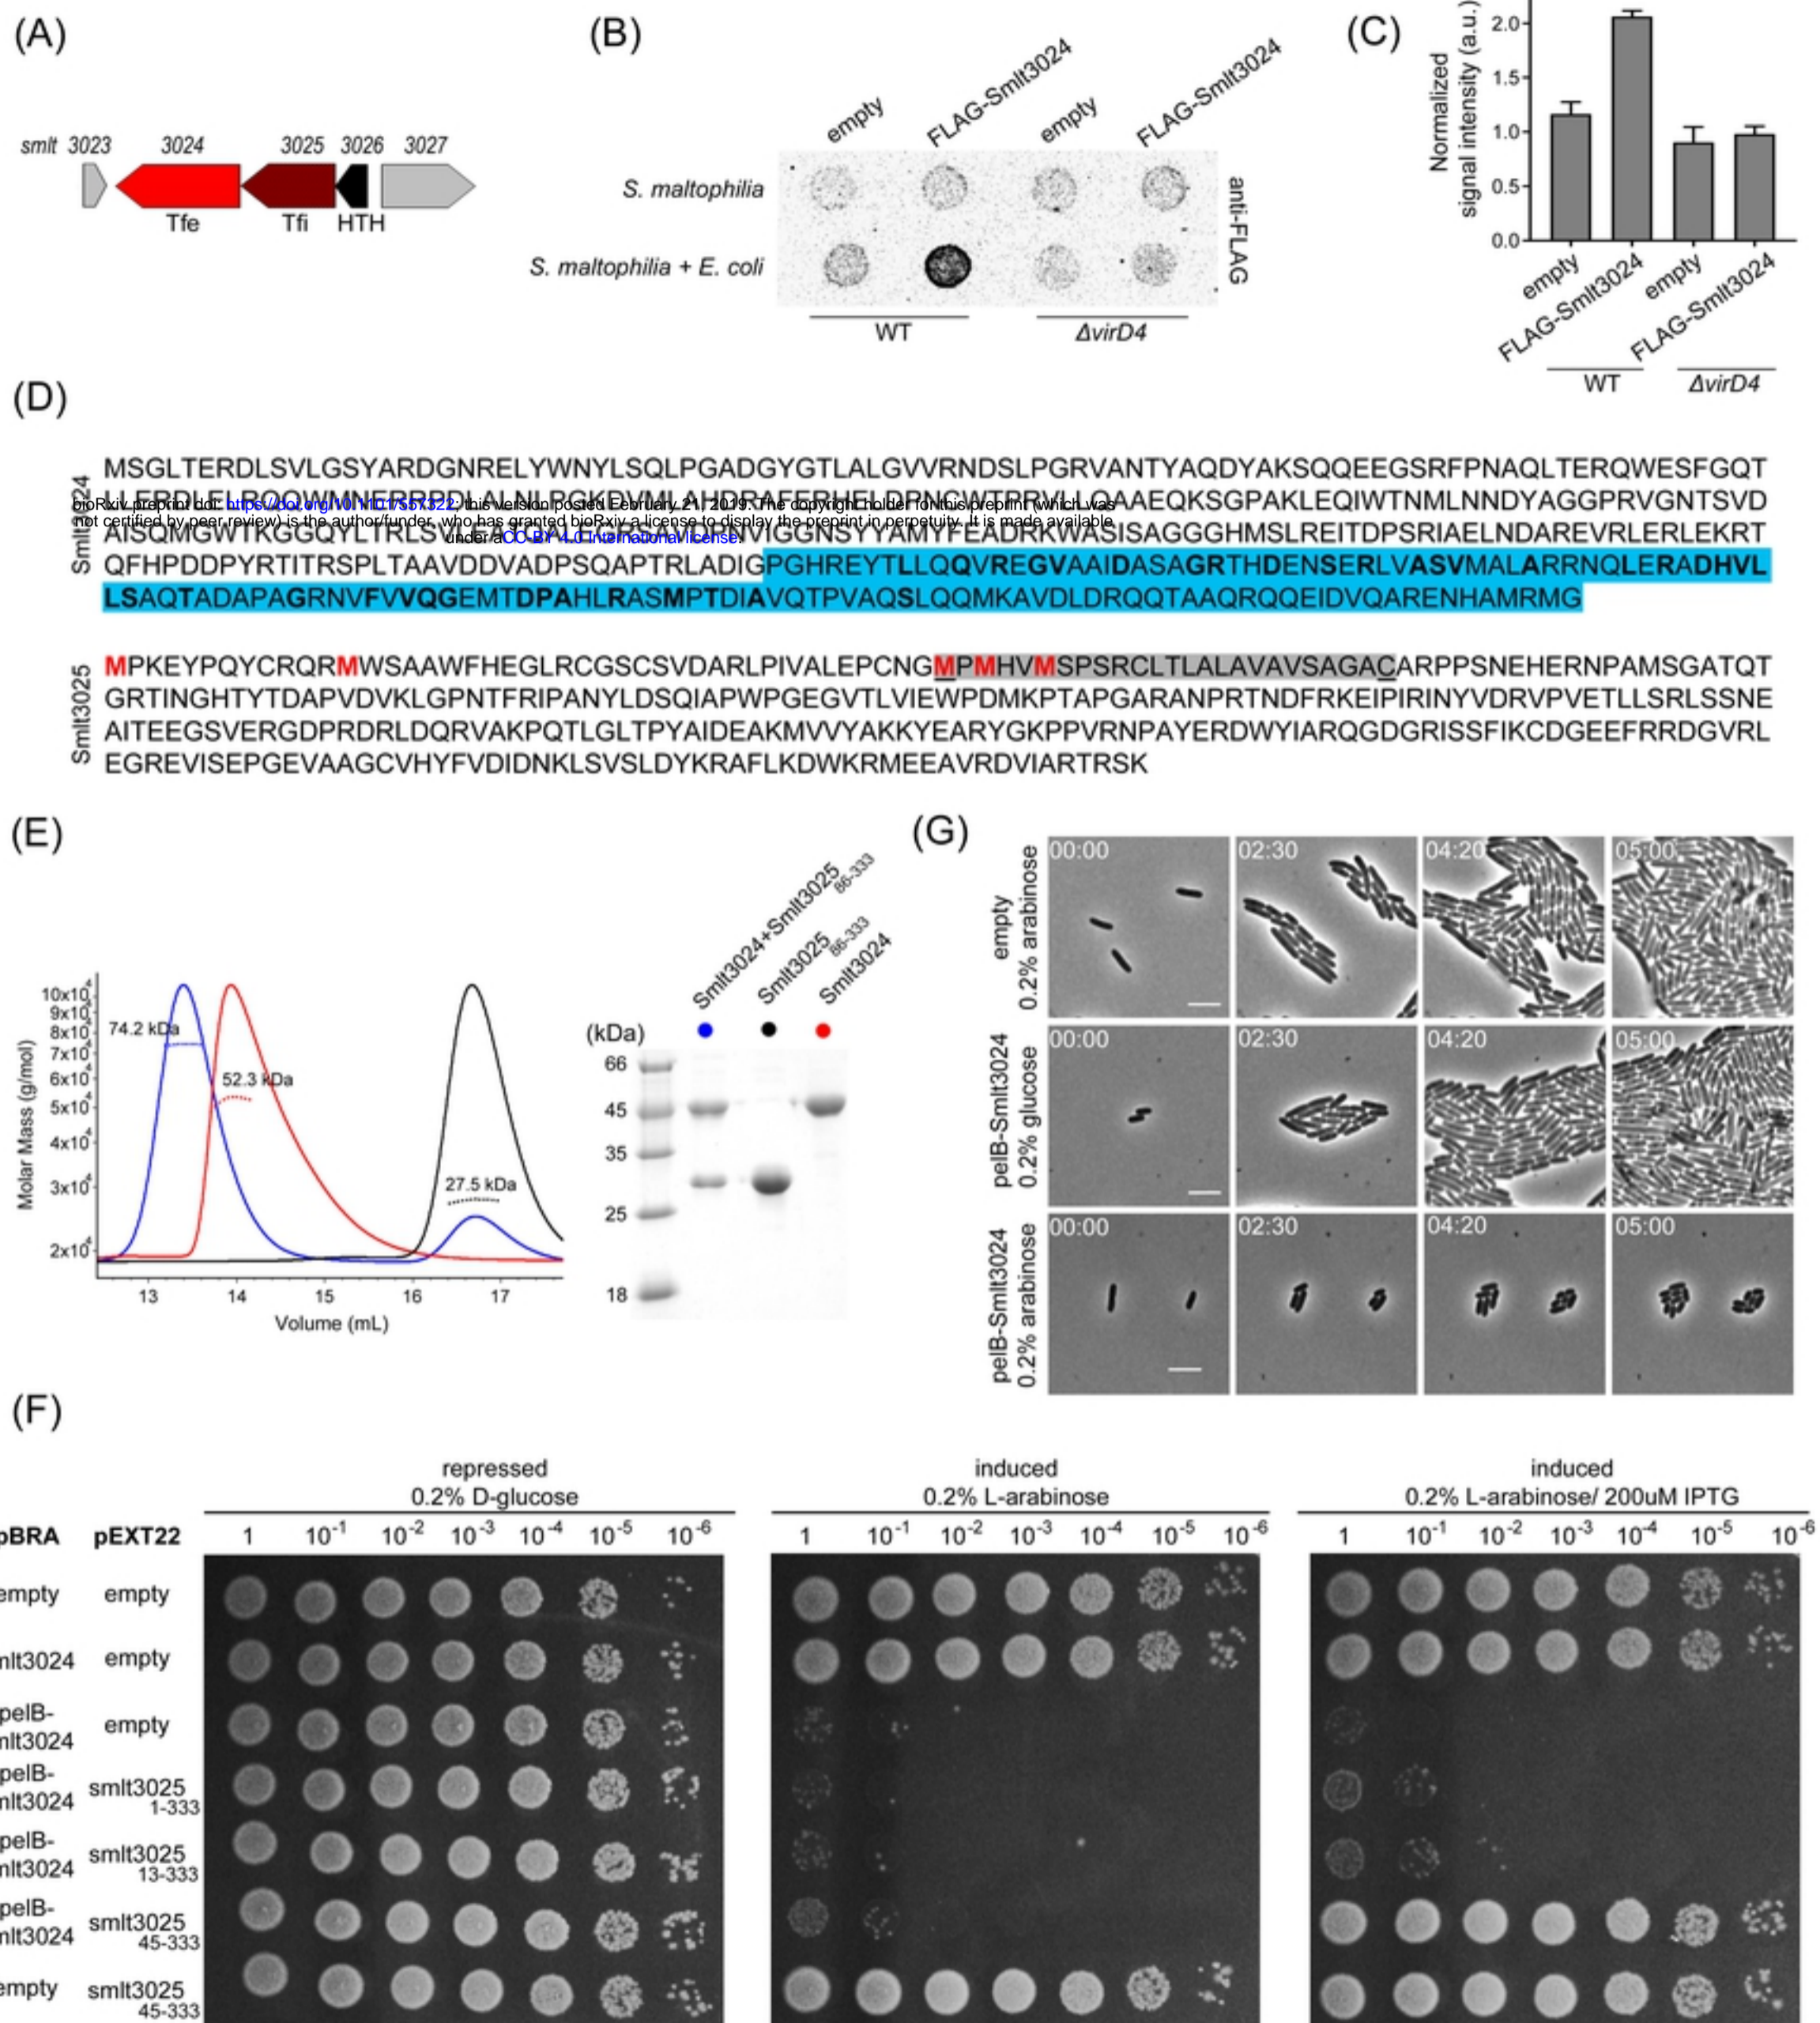

Figure 4
